# Supplementary material for: Iodobenzene-catalyzed synthesis of aryl sulfonate esters from aminoquinolines via remote radical C–O cross-coupling
Source: Royal Society of Chemistry journal article supplement (doi:10.1039/c7ra09053f), 2017-01-01

## Iodobenzene-Catalyzed Synthesis of Aryl Sulfonate Esters from Aminoquinolines *via* Remote Radical C-O Cross-Coupling

Chao Shen,<sup>\*a</sup> Ming Yang,<sup>c</sup> Jun Xu,<sup>c</sup> Chao Chen,<sup>b</sup> Kai Zheng,<sup>a</sup> Jiabing Shen<sup>c</sup> and Pengfei Zhang<sup>c</sup>

<sup>a</sup>College of Biology and Environmental Engineering, Zhejiang Shuren University, Hangzhou 310015, China.

<sup>b</sup>College of Life Sciences, Huzhou Teachers College, Huzhou, 313000, China

<sup>c</sup>College of Material, Chemistry and Chemical Engineering, Hangzhou Normal University, Hangzhou 310036 China

Email: [shenchaozju@163.com](mailto:shenchaozju@163.com)

### Supporting Information

#### Table of contents

|                                                             |    |
|-------------------------------------------------------------|----|
| 1. General Information                                      | 2  |
| 2. Experimental Section                                     | 2  |
| 3. Characterization of the products                         | 3  |
| 4. X-ray Crystal Data for <b>3y</b> and <b>3z</b>           | 13 |
| 5. Copies of <sup>1</sup> H and <sup>13</sup> C NMR Spectra | 15 |

#### 1. General Information

All the chemicals were obtained commercially and used without any prior purification. All products were isolated by short chromatography on a silica gel (200-300 mesh) column using petroleum ether (60-90°C) and ethyl acetate.  $^1\text{H}$ ,  $^{13}\text{C}$  and  $^{19}\text{F}$  NMR spectras were recorded on a Bruker Advance 500 spectrometer at ambient temperature with  $\text{CDCl}_3$  as solvent and tetramethylsilane (TMS) as the internal standard. Melting points were determined on an X-5 Data microscopic melting point apparatus. The small-angle X-ray diffraction(SAXRD) data was taken on a German Bruker D4 X-ray diffractometer. Analytical thin layer chromatography (TLC) was performed on Merk precoated TLC (silica gel 60 F254) plates. Compounds for HRMS were analyzed by positive mode electrospray ionization (ESI) using Agilent 6530 QTOF mass spectrometer.

## 2. Experimental Section

### General procedure for the synthesis of starting amides

To a 100 ml single neck flask charged with  $\text{CH}_2\text{Cl}_2$  (30 mL) was added with 8-aminoquinoline (10 mmol), triethylamine (15 mmol) and stirred at room temperature for 5 min, then the reaction solution was cooled in an ice bath. The acid chloride (11 mmol) was added dropwise (if solid, it was dissolved with  $\text{CH}_2\text{Cl}_2$ ). The reaction solution was stirring overnight. When it was completed (Monitored by TLC), the mixture was filtered through a pad of Celite, the solid was washed with  $\text{CH}_2\text{Cl}_2$  (25 mL), and the organic layer was washed with 1 M  $\text{NaHCO}_3$  aqueous solution (3 x 15 mL), then the organic layer was dried with  $\text{Na}_2\text{SO}_4$ , filtered, and *roto*-evaporated. The product was purified by silica gel column with PE/EtOAc(20/1).

### General procedure for the synthesis of compounds 3

A mixture of **1** (0.2 mmol), **2** (1.5 eq.) and  $\text{PhI}(\text{TFA})_2$  (2.0 eq.) in dioxane (1.0 mL)  $\text{PhI}$  (20 mol%),  $\text{CH}_3\text{CO}_3\text{H}$  (1.0 equiv), HFIP (1.0 mL) in 25 mL tube was stirred at room temperature under air atmosphere for 1 h. Monitored by TLC and after the reaction was completed, the solvent was removed under reduced pressure and the

residue was purified by silica gel column chromatography using PE/AcOEt as an eluent to afford the products aryl sulfonate esters 3.

### 3. Characterization of the products

#### 8-Benzamidoquinolin-5-yl 4-methylbenzenesulfonate(3a)

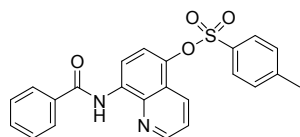

White solid, 93% yield, m.p. 161-162 °C; <sup>1</sup>H NMR (500 MHz, CDCl<sub>3</sub>) δ 10.65 (s, 1H), 8.86 (dd, *J* = 4.2, 1.4 Hz, 1H), 8.79 (d, *J* = 8.6 Hz, 1H), 8.41 (dd, *J* = 8.5, 1.5 Hz, 1H), 8.07 – 8.04 (m, 2H), 7.85 – 7.74 (m, 2H), 7.63 – 7.47 (m, 4H), 7.39 – 7.30 (m, 2H), 7.04 (d, *J* = 8.6 Hz, 1H), 2.45 (s, 3H). <sup>13</sup>C NMR (125 MHz, CDCl<sub>3</sub>) δ 165.52, 148.96, 145.84, 139.72, 138.92, 134.87, 133.92, 132.20, 132.07, 131.53, 129.99, 128.88, 128.72, 127.31, 123.08, 122.23, 119.97, 115.41, 21.74. HRMS (ESI<sup>+</sup>): Calculated for C<sub>23</sub>H<sub>18</sub>N<sub>2</sub>O<sub>4</sub>SH: [M+H]<sup>+</sup> 419.1060, Found 419.1061.

#### 8-Benzamidoquinolin-5-yl benzenesulfonate(3b)

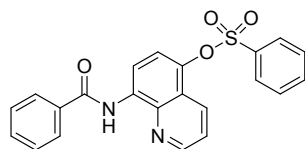

White solid, 94% yield, mp 93-94 °C; <sup>1</sup>H NMR (500 MHz, CDCl<sub>3</sub>) δ 10.64 (s, 1H), 8.89 – 8.76 (m, 2H), 8.35 (dd, *J* = 8.5, 1.6 Hz, 1H), 8.10 – 8.00 (m, 2H), 7.89 (dd, *J* = 8.4, 1.1 Hz, 2H), 7.73 – 7.63 (m, 1H), 7.62 – 7.50 (m, 5H), 7.48 (dd, *J* = 8.5, 4.2 Hz, 1H), 7.08 (d, *J* = 8.6 Hz, 1H). <sup>13</sup>C NMR (125 MHz, CDCl<sub>3</sub>) δ 165.49, 148.97, 139.57, 138.85, 135.20, 134.79, 134.56, 133.98, 132.08, 131.32, 129.38, 128.87, 128.63, 127.29, 122.94, 122.25, 120.02, 115.38. HRMS (ESI<sup>+</sup>): Calculated for C<sub>22</sub>H<sub>16</sub>N<sub>2</sub>O<sub>4</sub>SH: [M+H]<sup>+</sup> 405.0904, Found 405.0908.

#### 8-Benzamidoquinolin-5-yl 4-chlorobenzenesulfonate(3c)

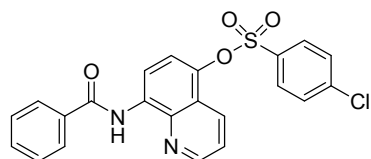

Brown solid, 92% yield, mp 177-178 °C; <sup>1</sup>H NMR (500 MHz, CDCl<sub>3</sub>) δ 10.65 (s, 1H), 8.87 (d, *J* = 3.1 Hz, 1H), 8.83 (d, *J* = 8.6 Hz, 1H), 8.36 (d, *J* = 8.2 Hz, 1H), 8.06 (d, *J* = 7.2 Hz, 2H), 7.83 (d, *J* = 8.5 Hz, 2H), 7.60-7.51 (m, 6H), 7.11 (d, *J* = 8.6 Hz, 1H); <sup>13</sup>C NMR (125 MHz, CDCl<sub>3</sub>) δ 165.54, 149.07, 141.48, 139.39, 138.87, 134.75, 134.17, 133.64, 132.12, 131.23, 130.04, 129.76, 128.89, 127.31, 122.85, 122.37, 119.97, 115.40. HRMS (ESI<sup>+</sup>): Calculated for C<sub>22</sub>H<sub>15</sub>ClN<sub>2</sub>O<sub>4</sub>SH: [M+H]<sup>+</sup> 439.0514, Found 439.0519.

### 8-Benzamidoquinolin-5-yl naphthalene-2-sulfonate(3d)

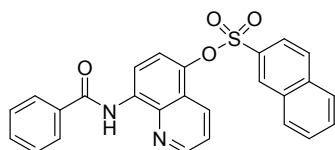

Brown solid, 90% yield, mp 159-160 °C; <sup>1</sup>H NMR (500 MHz, CDCl<sub>3</sub>) δ 10.62 (s, 1H), 8.82 (dd, *J* = 4.1, 1.4 Hz, 1H), 8.74 (d, *J* = 8.6 Hz, 1H), 8.46 – 8.39 (m, 2H), 8.05 – 8.01 (m, 2H), 7.99 (d, *J* = 8.7 Hz, 1H), 7.95 – 7.88 (m, 3H), 7.71 – 7.67 (m, 1H), 7.62 (dd, *J* = 11.5, 4.5 Hz, 1H), 7.59 – 7.50 (m, 3H), 7.45 (dd, *J* = 8.5, 4.2 Hz, 1H), 7.05 (d, *J* = 8.6 Hz, 1H). <sup>13</sup>C NMR (126 MHz, CDCl<sub>3</sub>) δ 165.46, 149.00, 139.67, 138.93, 135.56, 134.79, 133.97, 132.06, 132.02, 131.85, 131.35, 130.72, 129.84, 129.78, 129.52, 128.86, 128.81, 128.06, 127.27, 123.00, 122.86, 122.26, 119.92, 115.30. HRMS (ESI<sup>+</sup>): Calculated for C<sub>26</sub>H<sub>18</sub>N<sub>2</sub>O<sub>4</sub>SH: [M+H]<sup>+</sup> 455.1060, Found 455.1065.

### 8-Benzamidoquinolin-5-yl prop-2-ene-1-sulfonate(3e)

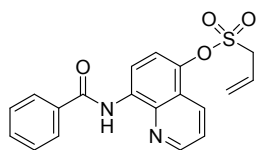

White solid, 75% yield, mp 90-91 °C; <sup>1</sup>H NMR (500 MHz, CDCl<sub>3</sub>) δ 10.68 (s, 1H), 8.92 (dd, *J* = 8.1, 5.0 Hz, 2H), 8.54 (d, *J* = 8.5 Hz, 1H), 8.21 – 7.96 (m, 2H), 7.66 – 7.52 (m, 5H), 7.48 (d, *J* = 8.6 Hz, 1H), 6.99-6.92 (m, 1H), 6.46 (dd, *J* = 15.1, 1.6 Hz, 1H), 1.97 (dd, *J* = 6.9, 1.6 Hz, 2H). <sup>13</sup>C NMR (126 MHz, CDCl<sub>3</sub>) δ 165.57, 148.97, 147.47, 139.51, 138.90, 134.81, 133.93, 132.09, 131.73, 128.87, 127.34, 125.07,

123.07, 122.37, 120.02, 115.73, 17.50. HRMS (ESI+): Calculated for C<sub>19</sub>H<sub>16</sub>N<sub>2</sub>O<sub>4</sub>SH: [M+H]<sup>+</sup> 369.0904, Found 369.0907.

### 8-Benzamidoquinolin-5-yl methanesulfonate(3f)

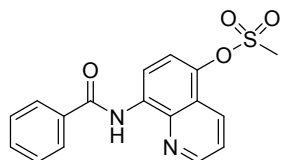

White solid, 95% yield, mp 181-182 °C; <sup>1</sup>H NMR (500 MHz, CDCl<sub>3</sub>) δ 10.68 (s, 1H), 8.96 (d, *J* = 8.6 Hz, 1H), 8.92 (dd, *J* = 4.2, 1.4 Hz, 1H), 8.53 (dd, *J* = 8.5, 1.4 Hz, 1H), 8.17 – 7.98 (m, 2H), 7.72 – 7.51 (m, 5H), 3.30 (s, 3H). <sup>13</sup>C NMR (125 MHz, CDCl<sub>3</sub>) δ 165.55, 149.18, 139.11, 139.09, 134.81, 134.27, 132.12, 131.37, 128.91, 127.35, 122.90, 122.59, 119.88, 115.63, 37.94. HRMS (ESI+): Calculated for C<sub>17</sub>H<sub>14</sub>N<sub>2</sub>O<sub>4</sub>SH: [M+H]<sup>+</sup> 343.0747, Found 343.0750.

### 8-Benzamidoquinolin-5-yl trifluoromethanesulfonate(3g)

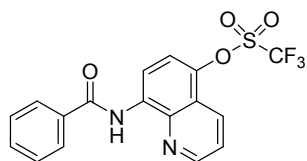

White solid, 88% yield, mp 111-113 °C; <sup>1</sup>H NMR (500 MHz, CDCl<sub>3</sub>) δ 10.71 (s, 1H), 9.02 (d, *J* = 8.7 Hz, 1H), 8.99 (dd, *J* = 4.2, 1.4 Hz, 1H), 8.46 (dd, *J* = 8.5, 1.3 Hz, 1H), 8.12 – 8.07 (m, 2H), 7.69 (dd, *J* = 8.5, 4.2 Hz, 1H), 7.63 – 7.56 (m, 4H). <sup>13</sup>C NMR (126 MHz, CDCl<sub>3</sub>) δ 165.57, 149.44, 138.96, 138.86, 135.17, 134.61, 132.23, 130.18, 128.93, 127.33, 123.24 (q, *J* = 273.4 Hz), 123.09, 119.68, 115.32, 114.05. HRMS (ESI+): Calculated for C<sub>17</sub>H<sub>11</sub>F<sub>3</sub>N<sub>2</sub>O<sub>4</sub>SH: [M+H]<sup>+</sup> 397.0465, Found 397.0467.

### 8-(4-methylbenzamido)quinolin-5-yl 4-methylbenzenesulfonate(3h)

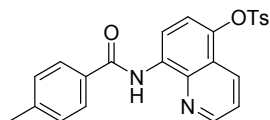

White solid, 91% yield, mp 129-130 °C; <sup>1</sup>H NMR (500 MHz, CDCl<sub>3</sub>) δ 10.62 (s, 1H), 8.86 (dd, *J* = 4.1, 1.4 Hz, 1H), 8.78 (d, *J* = 8.6 Hz, 1H), 8.40 (dd, *J* = 8.5, 1.4 Hz, 1H), 7.95 (d, *J* = 8.1 Hz, 2H), 7.76 (d, *J* = 8.3 Hz, 2H), 7.49 (dd, *J* = 8.5, 4.2 Hz, 1H), 7.36-7.31 (m, 4H), 7.03 (d, *J* = 8.6 Hz, 1H), 2.45 (s, 6H). <sup>13</sup>C NMR (125 MHz, CDCl<sub>3</sub>) δ 165.51, 148.89, 145.83, 142.64, 139.58, 138.85, 134.00, 132.15, 132.02, 131.53,

129.98, 129.54, 128.71, 127.33, 123.06, 122.18, 120.00, 115.35, 21.74, 21.55. HRMS (ESI+): Calculated for C<sub>24</sub>H<sub>20</sub>N<sub>2</sub>O<sub>4</sub>SH: [M+H]<sup>+</sup> 433.1217, Found 433.1219.

### 8-(2-methylbenzamido)quinolin-5-yl 4-methylbenzenesulfonate(3i)

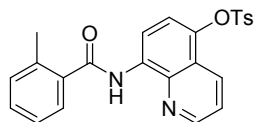

White solid, 92% yield, mp 128-129 °C. <sup>1</sup>H NMR (500 MHz, CDCl<sub>3</sub>) δ 10.14 (s, 1H), 8.92 – 8.66 (m, 2H), 8.39 (dd, *J* = 8.5, 1.6 Hz, 1H), 7.78 (d, *J* = 8.3 Hz, 2H), 7.65 (d, *J* = 7.6 Hz, 1H), 7.47 (dd, *J* = 8.5, 4.2 Hz, 1H), 7.44 – 7.37 (m, 1H), 7.37 – 7.28 (m, 4H), 7.04 (d, *J* = 8.6 Hz, 1H), 2.59 (s, 3H), 2.46 (s, 3H). <sup>13</sup>C NMR (125 MHz, CDCl<sub>3</sub>) δ 168.15, 148.94, 145.84, 139.70, 138.74, 136.75, 136.25, 134.02, 132.16, 131.46, 131.38, 130.53, 130.00, 128.67, 127.21, 126.07, 123.02, 122.20, 119.87, 115.26, 21.74, 20.19. HRMS (ESI+): Calculated for C<sub>24</sub>H<sub>20</sub>N<sub>2</sub>O<sub>4</sub>SH: [M+H]<sup>+</sup> 433.1217, Found 433.1219.

### 8-([1,1'-biphenyl]-2-ylcarboxamido)quinolin-5-yl 4-methylbenzenesulfonate(3j)

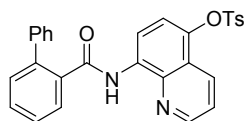

Yellow solid, 83% yield, mp 167-168 °C. <sup>1</sup>H NMR (500 MHz, CDCl<sub>3</sub>) δ 9.71 (s, 1H), 8.65 (d, *J* = 8.6 Hz, 1H), 8.52 (dd, *J* = 4.2, 1.6 Hz, 1H), 8.31 (dd, *J* = 8.5, 1.6 Hz, 1H), 7.89 (dd, *J* = 7.6, 1.1 Hz, 1H), 7.75 (d, *J* = 8.3 Hz, 2H), 7.56 (td, *J* = 7.5, 1.4 Hz, 1H), 7.51-7.46 (m, 4H), 7.37 (dd, *J* = 8.5, 4.2 Hz, 1H), 7.33 – 7.26 (m, 4H), 7.17 (t, *J* = 7.4 Hz, 1H), 6.94 (d, *J* = 8.6 Hz, 1H), 2.45 (s, 3H). <sup>13</sup>C NMR (125 MHz, CDCl<sub>3</sub>) δ 167.85, 148.28, 145.79, 140.35, 139.95, 139.52, 138.38, 135.69, 133.75, 132.21, 131.24, 130.78, 130.72, 129.97, 129.27, 129.00, 128.65, 128.42, 127.70, 127.67, 122.78, 121.92, 119.75, 115.24, 21.73. HRMS (ESI+): Calculated for C<sub>29</sub>H<sub>22</sub>N<sub>2</sub>O<sub>4</sub>SH: [M+H]<sup>+</sup> 495.1373, Found 495.1378.

### 8-(2-chlorobenzamido)quinolin-5-yl 4-methylbenzenesulfonate(3k)

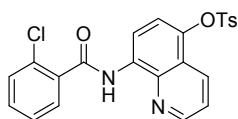

White solid, 80% yield, mp 183-184 °C. <sup>1</sup>H NMR (500 MHz, CDCl<sub>3</sub>) δ 10.44 (s, 1H), 8.80 (dd, *J* = 4.9, 3.3 Hz, 2H), 8.40 (dd, *J* = 8.5, 1.6 Hz, 1H), 7.78 (d, *J* = 8.4 Hz, 3H),

7.48 (dd,  $J = 8.5, 4.2$  Hz, 2H), 7.43 (dd,  $J = 12.2, 6.7$  Hz, 2H), 7.34 (d,  $J = 8.0$  Hz, 2H), 7.03 (d,  $J = 8.6$  Hz, 1H), 2.46 (s, 3H).  $^{13}\text{C}$  NMR (126 MHz,  $\text{CDCl}_3$ )  $\delta$  163.90, 148.06, 144.86, 138.95, 137.81, 134.40, 132.67, 131.02, 130.72, 130.34, 130.12, 129.57, 129.11, 128.99, 127.67, 126.21, 122.00, 121.25, 118.79, 114.66, 20.74. HRMS (ESI+): Calculated for  $\text{C}_{23}\text{H}_{17}\text{ClN}_2\text{O}_4\text{SH}$ :  $[\text{M}+\text{H}]^+$  453.0671, Found 453.0678.

### 8-(2-nitrobenzamido)quinolin-5-yl 4-methylbenzenesulfonate(3l)

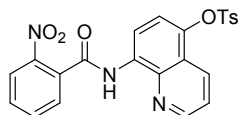

Yellow solid, 72% yield, mp 185-186 °C.  $^1\text{H}$  NMR (500 MHz,  $\text{CDCl}_3$ )  $\delta$  10.08 (s, 1H), 8.76 (s, 1H), 8.73 (d,  $J = 8.6$  Hz, 1H), 8.41 (dd,  $J = 8.5, 1.6$  Hz, 1H), 8.15 (s, 1H), 7.78 (s, 2H), 7.75 (d,  $J = 7.9$  Hz, 1H), 7.67 (d,  $J = 0.9$  Hz, 1H), 7.61 (d,  $J = 1.9$  Hz, 1H), 7.49 – 7.47 (m, 1H), 7.35 (d,  $J = 8.0$  Hz, 2H), 7.02 (d,  $J = 8.6$  Hz, 1H), 2.47 (s, 3H).  $^{13}\text{C}$  NMR (126 MHz,  $\text{CDCl}_3$ )  $\delta$  164.32, 149.07, 145.95, 140.24, 138.59, 133.91, 133.39, 131.98, 131.55, 131.00, 130.82, 130.07, 128.71, 128.58, 124.85, 124.79, 122.35, 121.78, 119.82, 115.92, 21.78. HRMS (ESI+): Calculated for  $\text{C}_{23}\text{H}_{17}\text{N}_3\text{O}_6\text{SH}$ :  $[\text{M}+\text{H}]^+$  464.0911, Found 464.0913.

### 8-(3-methylbenzamido)quinolin-5-yl 4-methylbenzenesulfonate(3m)

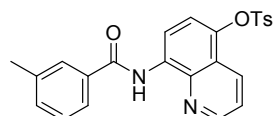

White solid, 89% yield, mp 166-167 °C.  $^1\text{H}$  NMR (500 MHz,  $\text{CDCl}_3$ )  $\delta$  10.61 (s, 1H), 8.87 (dd,  $J = 4.2, 1.6$  Hz, 1H), 8.79 (d,  $J = 8.6$  Hz, 1H), 8.41 (dd,  $J = 8.5, 1.6$  Hz, 1H), 7.89 – 7.80 (m, 2H), 7.77 (d,  $J = 8.3$  Hz, 2H), 7.51 (dd,  $J = 8.5, 4.2$  Hz, 1H), 7.46 – 7.37 (m, 2H), 7.32 (d,  $J = 8.0$  Hz, 2H), 7.04 (d,  $J = 8.6$  Hz, 1H), 2.48 (s, 3H), 2.45 (s, 3H).  $^{13}\text{C}$  NMR (126 MHz,  $\text{CDCl}_3$ )  $\delta$  165.78, 148.86, 145.84, 139.65, 138.77, 134.84, 134.81, 133.90, 132.83, 132.14, 131.62, 129.98, 128.70, 128.69, 128.07, 124.24, 123.07, 122.18, 119.99, 115.54, 21.73, 21.46. HRMS (ESI+): Calculated for  $\text{C}_{24}\text{H}_{20}\text{N}_2\text{O}_4\text{SH}$ :  $[\text{M}+\text{H}]^+$  433.1217, Found 433.1219.

### 8-(2,4-dichlorobenzamido)quinolin-5-yl 4-methylbenzenesulfonate(3n)

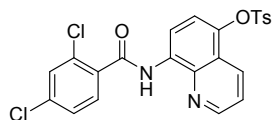

White solid, 75% yield, mp 196-197 °C. <sup>1</sup>H NMR (500 MHz, CDCl<sub>3</sub>) δ 10.48 (s, 1H), 8.81 (dd, *J* = 4.2, 1.6 Hz, 1H), 8.77 (d, *J* = 8.6 Hz, 1H), 8.40 (dd, *J* = 8.5, 1.6 Hz, 1H), 7.77 (dd, *J* = 8.3, 5.3 Hz, 3H), 7.52 (d, *J* = 2.0 Hz, 1H), 7.49 (dd, *J* = 8.5, 4.2 Hz, 1H), 7.39 (dd, *J* = 8.3, 2.0 Hz, 1H), 7.34 (d, *J* = 8.0 Hz, 2H), 7.04 (d, *J* = 8.6 Hz, 1H), 2.46 (s, 3H). <sup>13</sup>C NMR (126 MHz, CDCl<sub>3</sub>) δ 162.79, 148.12, 144.88, 139.08, 138.25, 137.77, 136.30, 132.68, 132.47, 131.02, 130.39, 130.27, 129.40, 129.00, 127.65, 126.64, 122.00, 121.30, 118.78, 114.76, 20.74. HRMS (ESI<sup>+</sup>): Calculated for C<sub>23</sub>H<sub>16</sub>Cl<sub>2</sub>N<sub>2</sub>O<sub>4</sub>SH: [M+H]<sup>+</sup> 487.0281, Found 487.0285.

### 8-Pivalamidoquinolin-5-yl 4-methylbenzenesulfonate(3o)

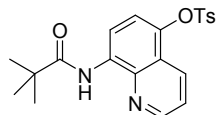

Yellow oil, 81% yield; <sup>1</sup>H NMR (500 MHz, CDCl<sub>3</sub>) δ 10.20 (s, 1H), 8.84 (d, *J* = 4.0 Hz, 1H), 8.66 (d, *J* = 8.6 Hz, 1H), 8.39 (d, *J* = 8.5 Hz, 1H), 7.77 (d, *J* = 8.2 Hz, 2H), 7.49 (dd, *J* = 8.5, 4.2 Hz, 1H), 7.33 (d, *J* = 8.1 Hz, 2H), 6.99 (d, *J* = 8.6 Hz, 1H), 2.47 (s, 3H), 1.43 (s, 9H). <sup>13</sup>C NMR (126 MHz, CDCl<sub>3</sub>) δ 177.33, 148.89, 145.78, 139.34, 138.91, 134.04, 132.15, 131.37, 129.96, 128.70, 122.96, 122.07, 119.92, 114.97, 40.37, 27.68, 21.73. HRMS (ESI<sup>+</sup>): Calculated for C<sub>21</sub>H<sub>22</sub>N<sub>2</sub>O<sub>4</sub>SH: [M+H]<sup>+</sup> 399.1373, Found 399.1379.

### 8-(cyclohexancarboxamido)quinolin-5-yl 4-methylbenzenesulfonate(3p)

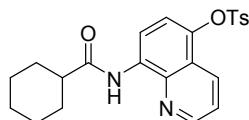

White solid, 88% yield, mp 122-123 °C; <sup>1</sup>H NMR (500 MHz, CDCl<sub>3</sub>) δ 9.81 (s, 1H), 8.80 (dd, *J* = 4.2, 1.6 Hz, 1H), 8.64 (d, *J* = 8.6 Hz, 1H), 8.36 (dd, *J* = 8.5, 1.6 Hz, 1H), 7.74 (d, *J* = 8.3 Hz, 2H), 7.46 (dd, *J* = 8.5, 4.2 Hz, 1H), 7.30 (d, *J* = 8.0 Hz, 2H), 6.97 (d, *J* = 8.6 Hz, 1H), 2.43 (s, 3H), 2.06 (dd, *J* = 13.6, 1.8 Hz, 2H), 1.94 – 1.81 (m, 2H),



1.78 – 1.68 (m, 1H), 1.61 (ddd,  $J = 24.7, 12.4, 3.1$  Hz, 2H), 1.45 – 1.27 (m, 4H).  $^{13}\text{C}$  NMR (126 MHz,  $\text{CDCl}_3$ )  $\delta$  174.88, 148.74, 145.77, 139.29, 138.54, 133.96, 132.12, 131.37, 129.94, 128.65, 122.92, 122.06, 119.90, 115.15, 46.81, 29.71, 25.75, 25.70, 21.70. HRMS (ESI+): Calculated for  $\text{C}_{23}\text{H}_{24}\text{N}_2\text{O}_4\text{SH}$ :  $[\text{M}+\text{H}]^+$  425.1530, Found 425.1534.

### 8-(3-phenylpropanamido)quinolin-5-yl 4-methylbenzenesulfonate(3q)

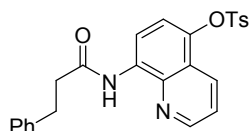

White solid, 87% yield, mp 115-116 °C;  $^1\text{H}$  NMR (500 MHz,  $\text{CDCl}_3$ )  $\delta$  9.71 (s, 1H), 8.76 (dd,  $J = 4.2, 1.5$  Hz, 1H), 8.63 (d,  $J = 8.6$  Hz, 1H), 8.36 (dd,  $J = 8.5, 1.5$  Hz, 1H), 7.74 (d,  $J = 8.3$  Hz, 2H), 7.45 (dd,  $J = 8.5, 4.2$  Hz, 1H), 7.33 – 7.26 (m, 6H), 7.23 – 7.17 (m, 1H), 6.98 (d,  $J = 8.6$  Hz, 1H), 3.16 – 3.10 (m, 2H), 2.90 – 2.84 (m, 2H), 2.44 (s, 3H).  $^{13}\text{C}$  NMR (125 MHz,  $\text{CDCl}_3$ )  $\delta$  170.80, 148.67, 145.80, 140.60, 139.46, 138.31, 133.68, 132.17, 131.48, 129.96, 128.66, 128.58, 128.38, 126.30, 122.94, 122.09, 119.89, 115.34, 39.61, 31.38, 21.72. HRMS (ESI+): Calculated for  $\text{C}_{25}\text{H}_{22}\text{N}_2\text{O}_4\text{SH}$ :  $[\text{M}+\text{H}]^+$  447.1373, Found 447.1376.

### 8-(furan-2-carboxamido)quinolin-5-yl 4-methylbenzenesulfonate(3r)

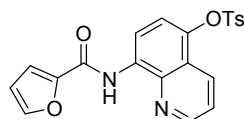

White solid, 91% yield, mp 161-162 °C;  $^1\text{H}$  NMR (500 MHz,  $\text{CDCl}_3$ )  $\delta$  10.66 (s, 1H), 8.87 (d,  $J = 4.1$  Hz, 1H), 8.72 (d,  $J = 8.6$  Hz, 1H), 8.37 (d,  $J = 8.5$  Hz, 1H), 7.76 (d,  $J = 8.3$  Hz, 2H), 7.61 (s, 1H), 7.48 (dd,  $J = 8.5, 4.2$  Hz, 1H), 7.30 (dd,  $J = 9.0, 5.8$  Hz, 3H), 7.04 (d,  $J = 8.6$  Hz, 1H), 6.58 (dd,  $J = 3.4, 1.7$  Hz, 1H), 2.44 (s, 3H).  $^{13}\text{C}$  NMR (125 MHz,  $\text{CDCl}_3$ )  $\delta$  156.33, 149.03, 148.07, 145.82, 144.72, 139.76, 138.72, 133.48, 132.15, 131.37, 129.96, 128.65, 123.01, 122.21, 119.87, 115.47, 115.44, 112.51, 21.70. HRMS (ESI+): Calculated for  $\text{C}_{21}\text{H}_{16}\text{N}_2\text{O}_5\text{SH}$ :  $[\text{M}+\text{H}]^+$  409.0853, Found 409.0858.

### 8-(nicotinamido)quinolin-5-yl 4-methylbenzenesulfonate(3s)

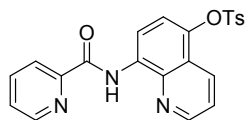

White solid, 83% yield, mp 184-185°C;  $^1\text{H}$  NMR (500 MHz,  $\text{CDCl}_3$ )  $\delta$  12.19 (s, 1H), 8.95 (dd,  $J = 4.2, 1.6$  Hz, 1H), 8.87 (d,  $J = 8.6$  Hz, 1H), 8.78 – 8.74 (m, 1H), 8.40 – 8.28 (m, 2H), 7.91 (td,  $J = 7.7, 1.6$  Hz, 1H), 7.76 (d,  $J = 8.3$  Hz, 2H), 7.52 – 7.45 (m, 2H), 7.30 (d,  $J = 8.1$  Hz, 2H), 7.10 (d,  $J = 8.6$  Hz, 1H), 2.43 (s, 3H).  $^{13}\text{C}$  NMR (125 MHz,  $\text{CDCl}_3$ )  $\delta$  162.77, 150.23, 149.32, 148.57, 145.76, 139.87, 139.47, 137.51, 133.80, 132.17, 131.07, 129.93, 128.67, 126.48, 123.04, 122.51, 122.11, 119.82, 115.51, 21.70. HRMS (ESI+): Calculated for  $\text{C}_{22}\text{H}_{17}\text{N}_3\text{O}_4\text{SH}$ :  $[\text{M}+\text{H}]^+$  420.1013, Found 420.1016.

#### 8-(thiophene-2-carboxamido)quinolin-5-yl 4-methylbenzenesulfonate(3t)

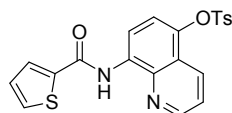

White solid, 82% yield, mp 159-160 °C;  $^1\text{H}$  NMR (500 MHz,  $\text{CDCl}_3$ )  $\delta$  10.43 (s, 1H), 8.79 (d,  $J = 2.7$  Hz, 1H), 8.62 (d,  $J = 8.6$  Hz, 1H), 8.33 (d,  $J = 8.5$  Hz, 1H), 7.75 (d,  $J = 3.7$  Hz, 1H), 7.69 (d,  $J = 8.3$  Hz, 2H), 7.52 (d,  $J = 5.0$  Hz, 1H), 7.45 – 7.42 (m, 1H), 7.25 (d,  $J = 8.2$  Hz, 2H), 7.12 – 7.10 (m, 1H), 6.94 (d,  $J = 8.6$  Hz, 1H), 2.38 (s, 3H).  $^{13}\text{C}$  NMR (126 MHz,  $\text{CDCl}_3$ )  $\delta$  159.02, 147.97, 144.84, 138.63, 138.60, 137.58, 132.58, 130.99, 130.46, 130.23, 128.97, 127.67, 127.65, 126.93, 122.01, 121.25, 118.93, 114.27, 20.73. HRMS (ESI+): Calculated for  $\text{C}_{21}\text{H}_{16}\text{N}_2\text{O}_4\text{S}_2\text{H}$ :  $[\text{M}+\text{H}]^+$  425.0624, Found 425.0627.

#### 8-(tetrahydrofuran-2-carboxamido)quinolin-5-yl 4-methylbenzenesulfonate(3u)

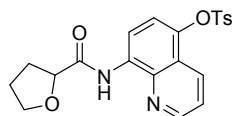

White solid, 87% yield, mp 103-104 °C;  $^1\text{H}$  NMR (500 MHz,  $\text{CDCl}_3$ )  $\delta$  10.83 (s, 1H), 8.86 (dd,  $J = 4.2, 1.5$  Hz, 1H), 8.66 (d,  $J = 8.6$  Hz, 1H), 8.35 (dd,  $J = 8.5, 1.6$  Hz, 1H), 7.75 (d,  $J = 8.3$  Hz, 2H), 7.46 (dd,  $J = 8.5, 4.2$  Hz, 1H), 7.30 (d,  $J = 8.1$  Hz, 2H), 7.02 (d,  $J = 8.6$  Hz, 1H), 4.59 (dd,  $J = 8.4, 5.7$  Hz, 1H), 4.26 – 4.12 (m, 1H), 4.05 (d,  $J = 8.2$  Hz, 1H), 2.44 (s, 3H), 2.42 – 2.36 (m, 1H), 2.29 – 2.18 (m, 1H), 1.98 (dd,  $J = 14.3, 7.1$  Hz, 2H).  $^{13}\text{C}$  NMR (126 MHz,  $\text{CDCl}_3$ )  $\delta$  172.23, 149.17, 145.78, 139.82, 138.94,

133.22, 132.15, 131.25, 129.94, 128.64, 122.99, 122.08, 119.73, 115.42, 79.09, 69.78, 30.42, 25.54, 21.70. HRMS (ESI+): Calculated for C<sub>21</sub>H<sub>20</sub>N<sub>2</sub>O<sub>5</sub>SH: [M+H]<sup>+</sup> 413.1166, Found 413.1168.

**8-benzamido-2-methylquinolin-5-yl 4-methylbenzenesulfonate(3v)**

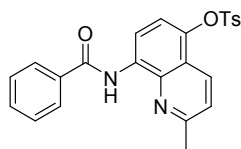

White solid, 80% yield, mp 127-128 °C; <sup>1</sup>H NMR (500 MHz, CDCl<sub>3</sub>) δ 10.72 (s, 1H), 8.73 (d, *J* = 8.6 Hz, 1H), 8.30 (d, *J* = 8.6 Hz, 1H), 8.05 (d, *J* = 6.8 Hz, 2H), 7.76 (d, *J* = 8.3 Hz, 2H), 7.59 (d, *J* = 7.0 Hz, 1H), 7.57 (d, *J* = 7.5 Hz, 2H), 7.38 (d, *J* = 8.6 Hz, 1H), 7.33 (d, *J* = 8.1 Hz, 2H), 6.92 (d, *J* = 8.6 Hz, 1H), 2.77 (s, 3H), 2.46 (s, 3H). <sup>13</sup>C NMR (126 MHz, CDCl<sub>3</sub>) δ 164.40, 157.24, 144.74, 138.83, 137.37, 133.95, 132.18, 131.08, 130.97, 130.55, 128.93, 127.86, 127.69, 126.23, 122.10, 120.15, 117.84, 114.34, 24.34, 21.68. HRMS (ESI+): Calculated for C<sub>24</sub>H<sub>20</sub>N<sub>2</sub>O<sub>4</sub>SH: [M+H]<sup>+</sup> 433.1217, Found 433.1219.

**8-Benzamido-6-methoxyquinolin-5-yl 4-methylbenzenesulfonate(3w)**

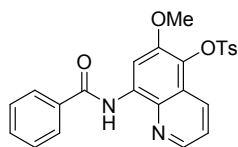

White solid, 95% yield, mp 145-146 °C; <sup>1</sup>H NMR (500 MHz, CDCl<sub>3</sub>) δ 10.79 (s, 1H), 8.86 (s, 1H), 8.74 (d, *J* = 4.2 Hz, 1H), 8.46 (d, *J* = 7.1 Hz, 1H), 8.07 (d, *J* = 6.9 Hz, 2H), 7.86 (d, *J* = 8.3 Hz, 2H), 7.61 (d, *J* = 7.1 Hz, 1H), 7.58 (d, *J* = 7.6 Hz, 2H), 7.53 – 7.50 (m, 1H), 7.36 (d, *J* = 8.1 Hz, 2H), 3.68 (s, 3H), 2.49 (s, 3H). <sup>13</sup>C NMR (126 MHz, CDCl<sub>3</sub>) δ 164.66, 148.70, 145.47, 144.18, 133.81, 133.57, 132.73, 132.59, 131.20, 129.97, 128.40, 127.92, 127.68, 126.26, 125.01, 123.44, 121.78, 103.32, 55.06, 21.68. HRMS (ESI+): Calculated for C<sub>24</sub>H<sub>20</sub>N<sub>2</sub>O<sub>5</sub>SH: [M+H]<sup>+</sup> 449.1166, Found 449.1168.

**8-Benzamidoquinolin-5-yl((1R,4R)-7,7-dimethyl-2-oxobicyclo[2.2.1]heptan-1-yl)methanesulfonate(3y)**

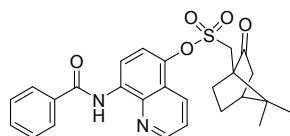

White solid, 88% yield, mp 124-125 °C; <sup>1</sup>H NMR (500 MHz, CDCl<sub>3</sub>) δ 10.68 (s, 1H), 8.96 (d, *J* = 8.6 Hz, 1H), 8.90 (dd, *J* = 4.1, 1.2 Hz, 1H), 8.59 (dd, *J* = 8.5, 1.1 Hz, 1H), 8.08 (d, *J* = 7.1 Hz, 2H), 7.64-7.55 (m, 5H), 4.00 (d, *J* = 14.9 Hz, 1H), 3.37 (d, *J* = 14.9 Hz, 1H), 2.65 – 2.53 (m, 1H), 2.50 – 2.40 (m, 1H), 2.17 (t, *J* = 4.5 Hz, 1H), 2.16 – 2.06 (m, 1H), 2.00 (d, *J* = 18.5 Hz, 1H), 1.82-1.76 (m, 1H), 1.52-1.46(m, 1H), 1.18 (s, 3H), 0.95 (s, 3H). <sup>13</sup>C NMR (125 MHz, CDCl<sub>3</sub>) δ 213.80, 165.38, 148.87, 139.03, 138.83, 134.73, 133.86, 131.93, 131.63, 128.74, 127.23, 123.01, 122.38, 119.80, 115.73, 58.15, 48.27, 47.93, 42.83, 42.37, 26.79, 25.15, 19.82, 19.63. HRMS (ESI<sup>+</sup>): Calculated for C<sub>26</sub>H<sub>26</sub>N<sub>2</sub>O<sub>5</sub>SH: [M+H]<sup>+</sup> 479.1635, Found 479.1638.

### Ethyl 8-benzamido-4-chloro-5-(tosyloxy)quinoline-3-carboxylate(3z)

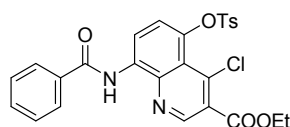

White solid, 65% yield, mp 168-170 °C; <sup>1</sup>H NMR (500 MHz, CDCl<sub>3</sub>) δ 10.66 (s, 1H), 8.96 (d, *J* = 1.9 Hz, 1H), 8.93 – 8.88 (m, 1H), 8.03 (d, *J* = 7.8 Hz, 2H), 7.79 – 7.74 (m, 2H), 7.61 (d, *J* = 6.1 Hz, 1H), 7.56 (t, *J* = 6.8 Hz, 2H), 7.34 (d, *J* = 7.4 Hz, 2H), 7.15 (d, *J* = 8.7 Hz, 1H), 4.54 – 4.48 (m, 2H), 2.47 (s, 3H), 1.49 – 1.44 (m, 3H). <sup>13</sup>C NMR (125 MHz, CDCl<sub>3</sub>) δ 165.55, 164.56, 147.61, 145.88, 140.51, 140.41, 139.31, 134.55, 132.41, 132.30, 129.93, 128.96, 128.92, 127.84, 127.29, 127.21, 123.53, 120.87, 117.45, 62.52, 21.77, 14.22. HRMS (ESI<sup>+</sup>): Calculated for C<sub>26</sub>H<sub>21</sub>ClN<sub>2</sub>O<sub>6</sub>SH: [M+H]<sup>+</sup> 525.0882, Found 525.0885.

### The exploration of the analogous substrates

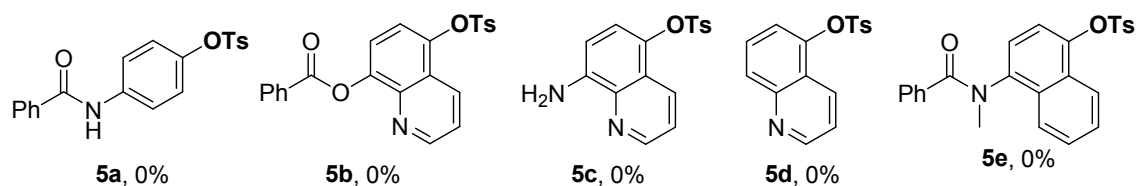

#### 4. X-ray Crystal Data for **3y** and **3z**

Crystals of **3y** (C<sub>26</sub>H<sub>26</sub>N<sub>2</sub>O<sub>5</sub>S) and **3z** (C<sub>26</sub>H<sub>21</sub>ClN<sub>2</sub>O<sub>6</sub>S) were recrystallized from PE/AcOEt. The single faint yellow transparent granular crystal which was suitable for X-ray diffraction measurements was mounted on a glass fiber. Unit cell measurements and intensity data collections were performed on a Rigaku AFC7R diffractometer with graphite monochromated Mo Ka. The data reduction included a correction for Lorentz and polarization effects, with an applied multi-scan absorption correction (SADABS). The crystal structure was solved and refined using the SHELXTL-97 program suite. Direct methods yielded all non-hydrogen atoms which were refined with anisotropic thermal parameters. The obtained crystal structure has been deposited at the Cambridge Crystallographic Data Centre and allocated the deposition number: 1515409 (**3u**, CCDC NO.); 1515410 (**3v**, CCDC NO.) The crystallographic data and refinement parameters of them are listed in **Table S1-2**.

**Table S1.** Crystallographic data and structure refinement for **3y**

|                                          |                                                                 |
|------------------------------------------|-----------------------------------------------------------------|
| Empirical formula                        | C <sub>26</sub> H <sub>26</sub> N <sub>2</sub> O <sub>5</sub> S |
| Formula weight                           | 478.55                                                          |
| Temperature, K                           | 296.17                                                          |
| Wavelength, Å                            | 0.71073                                                         |
| Crystal system                           | Monoclinic                                                      |
| Space group                              | P21                                                             |
| Hall group                               | P 2yb                                                           |
| <i>a</i> , <i>b</i> , <i>c</i> , Å       | 8.7588(12), 15.745(2), 17.316(2)                                |
| <i>α</i> , <i>β</i> , <i>γ</i> , °       | 90.00, 99.308(2), 90.00                                         |
| Volume, Å <sup>3</sup>                   | 2356.6(6)                                                       |
| <i>Z</i>                                 | 4                                                               |
| Calculated density, Mg/m <sup>3</sup>    | 1.349                                                           |
| Absorption coefficient, mm <sup>-1</sup> | 0.178                                                           |
| <i>F</i> (000)                           | 1008                                                            |

|                                      |                                    |
|--------------------------------------|------------------------------------|
| Theta range for data collection, °   | 1.19 to 25.10                      |
| Limiting indices                     | -10<=h<=10, -18<=k<=18, -20<=l<=20 |
| Data / restraints / parameters       | 8330/1/613                         |
| Goodness of fit on $F^2$             | 1.043                              |
| Final R indices [ $I > 2\sigma(I)$ ] | R1 = 0.0455 , wR2 = 0.1190         |
| R indices (all data)                 | R1 = 0.0643 , wR2 = 0.1417         |

**Table S2.** Crystallographic data and structure refinement for **3z**

|                                          |                                   |
|------------------------------------------|-----------------------------------|
| Empirical formula                        | $C_{26}H_{21}ClN_2O_6S$           |
| Formula weight                           | 524.96                            |
| Temperature, K                           | 296                               |
| Wavelength, Å                            | 0.71073                           |
| Crystal system                           | Monoclinic                        |
| Space group                              | P21/n                             |
| Hall group                               | -P 2yn                            |
| $a, b, c$ , Å                            | 8.9158(9), 9.1950(9), 29.183(3)   |
| $\alpha, \beta, \gamma$ , °              | 90.00, 95.779(2), 90.00           |
| Volume, Å <sup>3</sup>                   | 2380.3(4)                         |
| $Z$                                      | 4                                 |
| Calculated density, Mg/m <sup>3</sup>    | 1.465                             |
| Absorption coefficient, mm <sup>-1</sup> | 0.295                             |
| $F(000)$                                 | 1088                              |
| Theta range for data collection, °       | 1.40 to 25.10                     |
| Limiting indices                         | -10<=h<=9, -10<=k<=10, -34<=l<=32 |
| Data / restraints / parameters           | 4235/0/335                        |
| Goodness of fit on $F^2$                 | 1.047                             |
| Final R indices [ $I > 2\sigma(I)$ ]     | R1 = 0.0422, wR2 = 0.1186         |
| R indices (all data)                     | R1 = 0.0590, wR2 = 0.1385         |

## 5. Copies of $^1\text{H}$ and $^{13}\text{C}$ NMR Spectra

### 3a, $^1\text{H}$ NMR

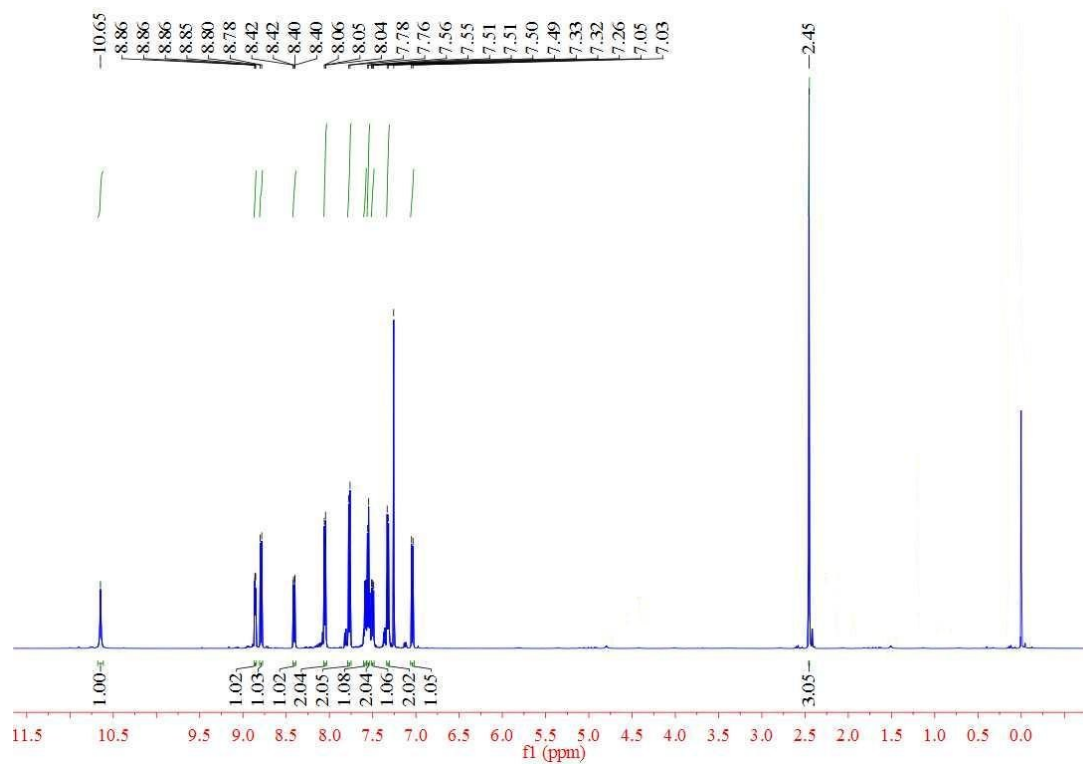

### 3a, $^{13}\text{C}$ NMR

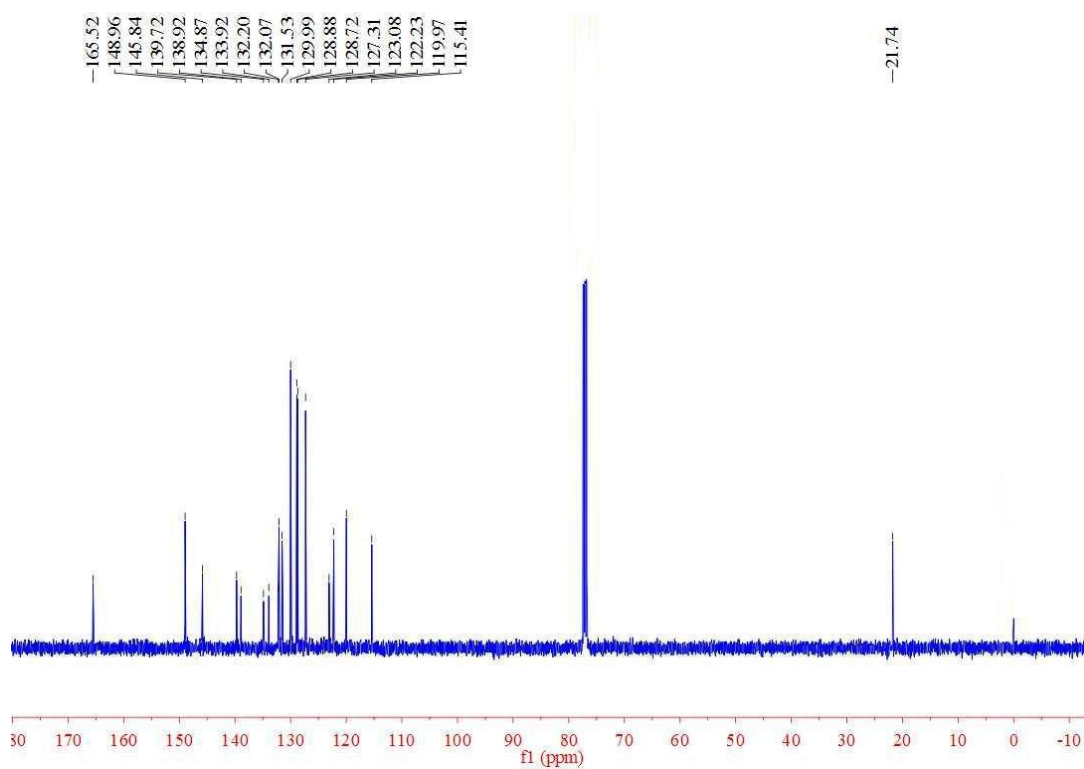

**3b, <sup>1</sup>H NMR**

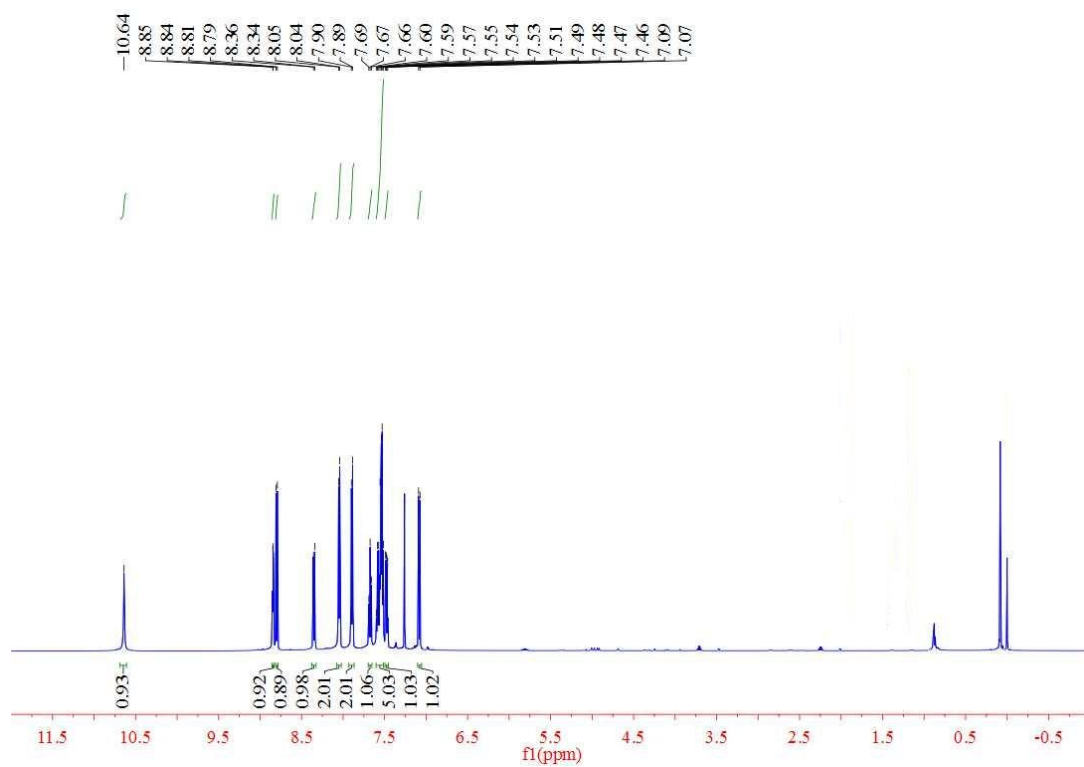

**3b, <sup>13</sup>C NMR**



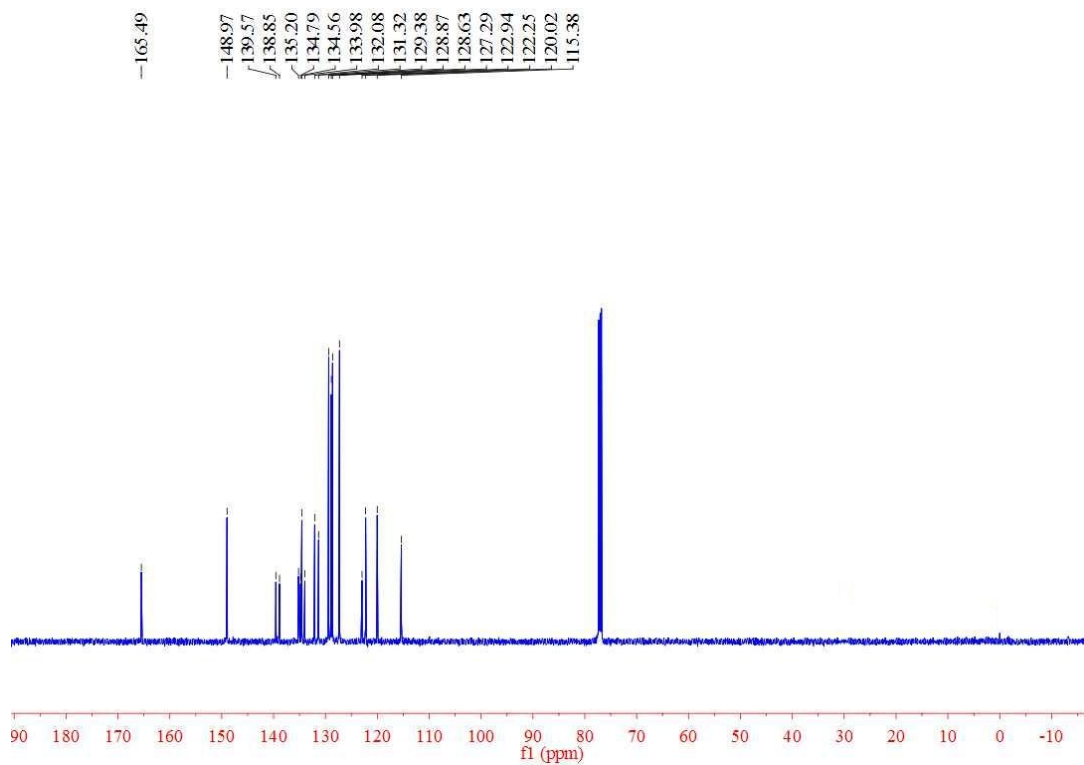

**3c, <sup>1</sup>H NMR**

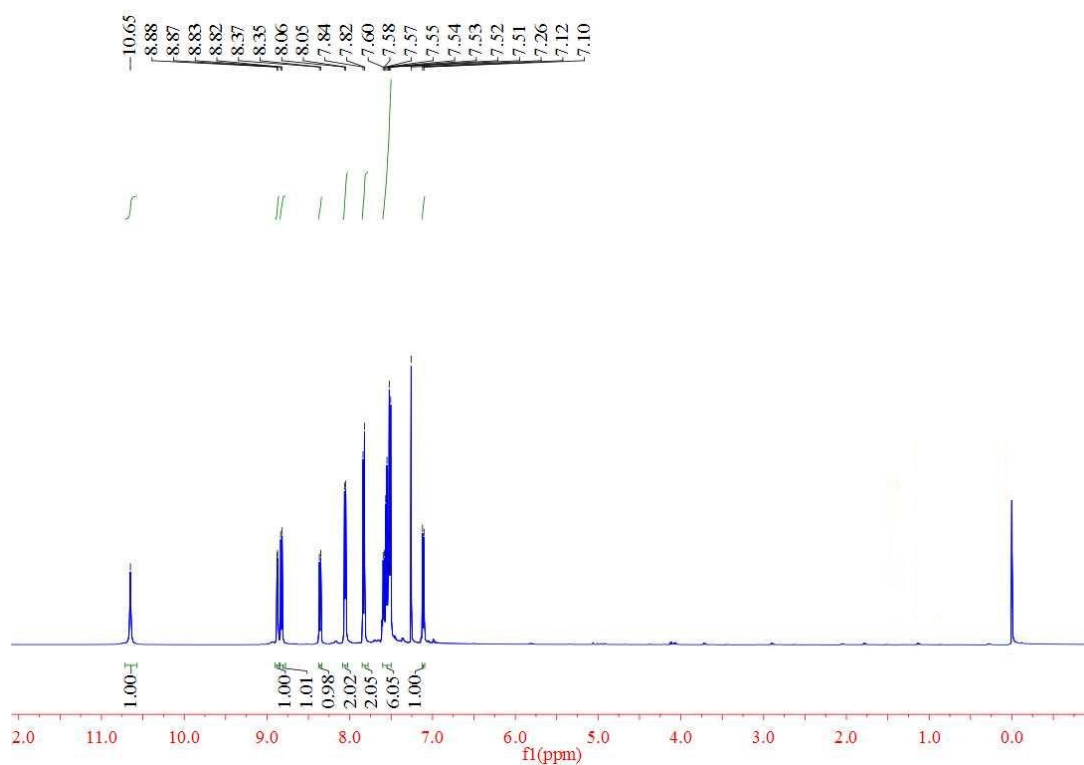

**3c, <sup>13</sup>C NMR**

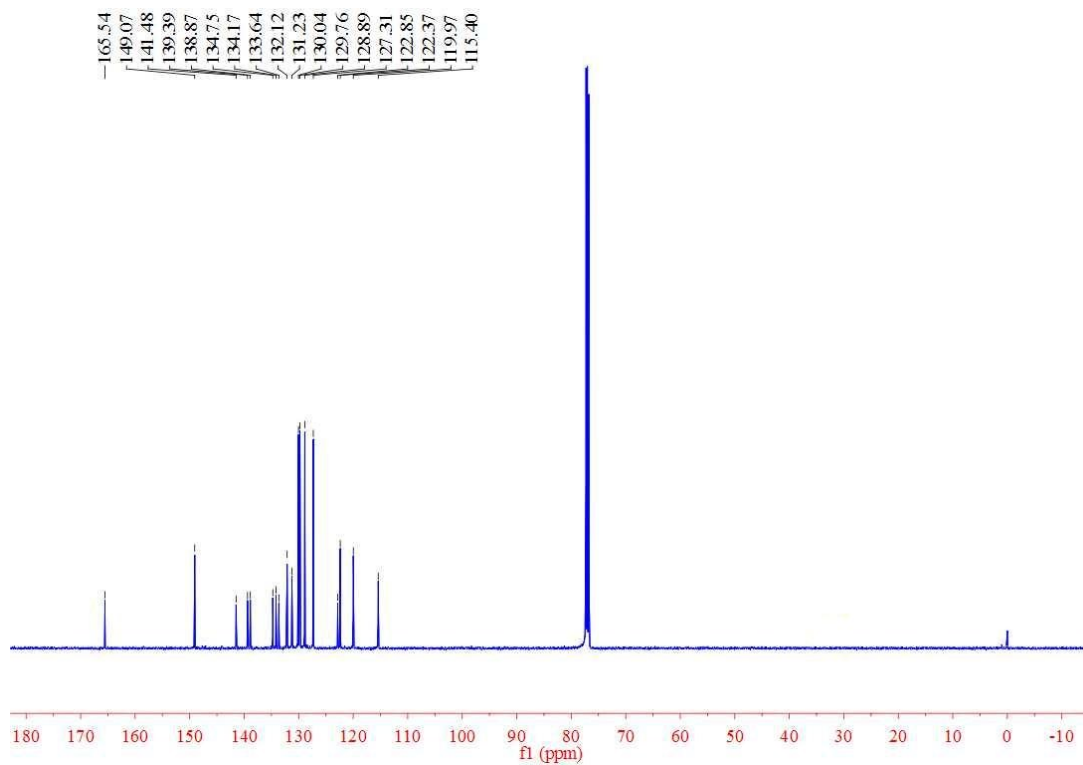

**3d, <sup>1</sup>H NMR**

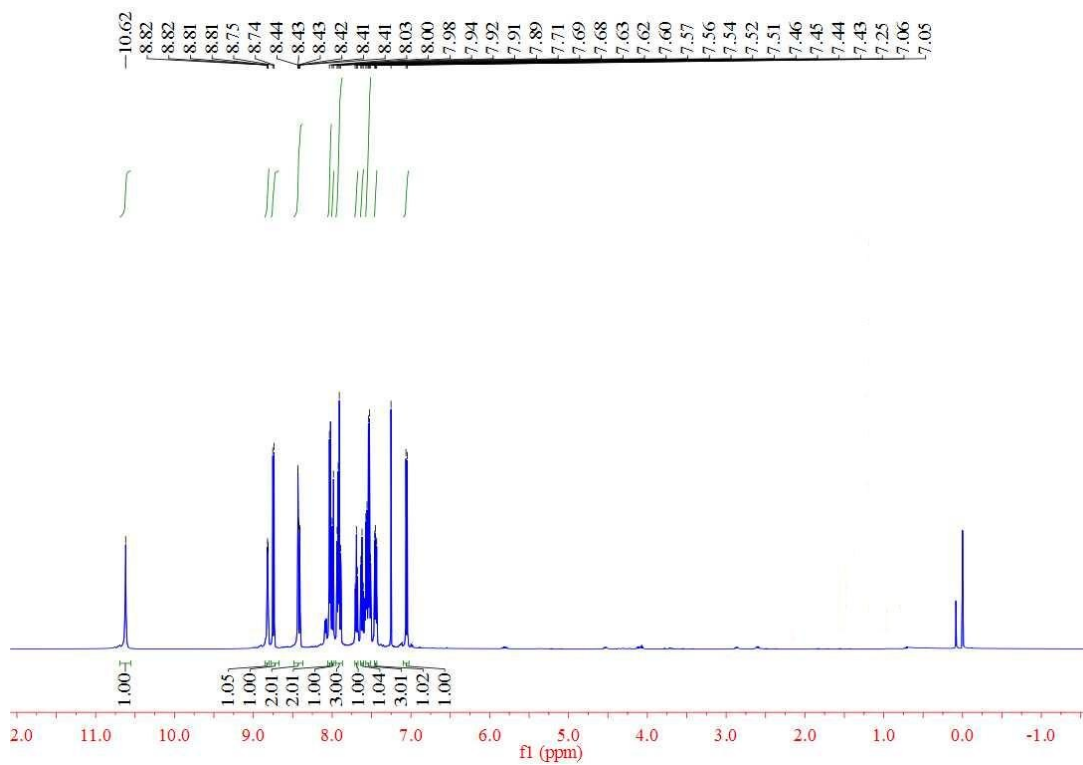

**3d, <sup>13</sup>C NMR**

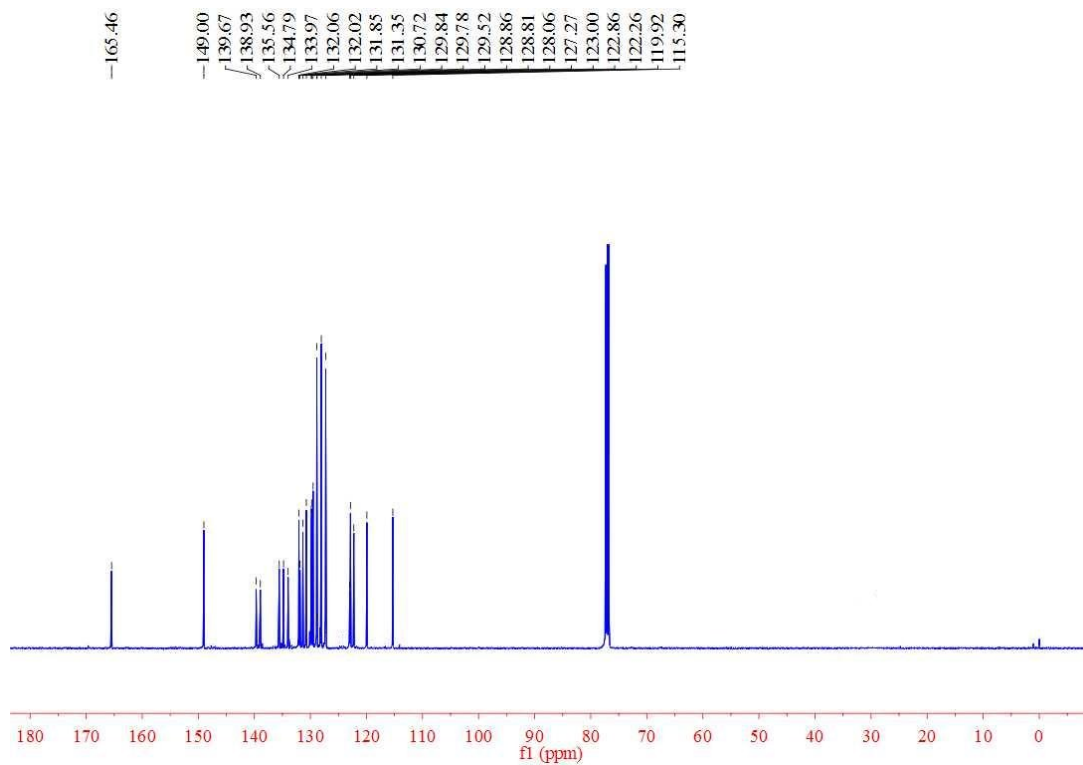

3e, <sup>1</sup>H NMR

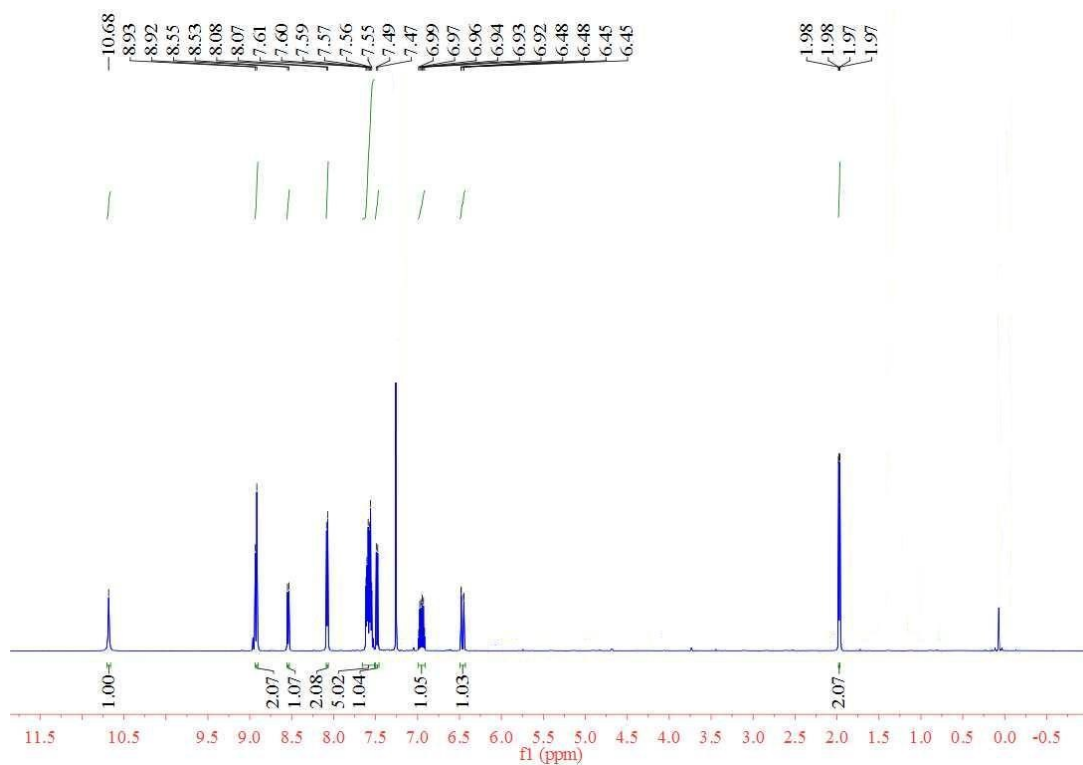

3e, <sup>13</sup>C NMR

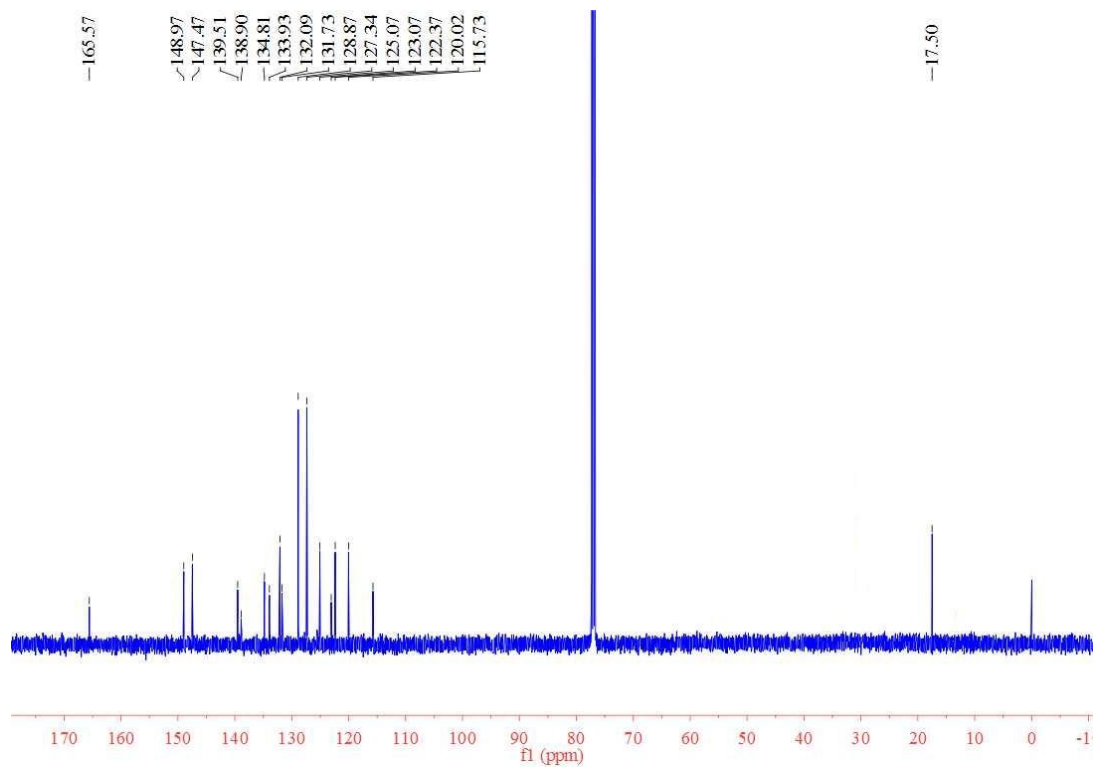

**3f, <sup>1</sup>H NMR**

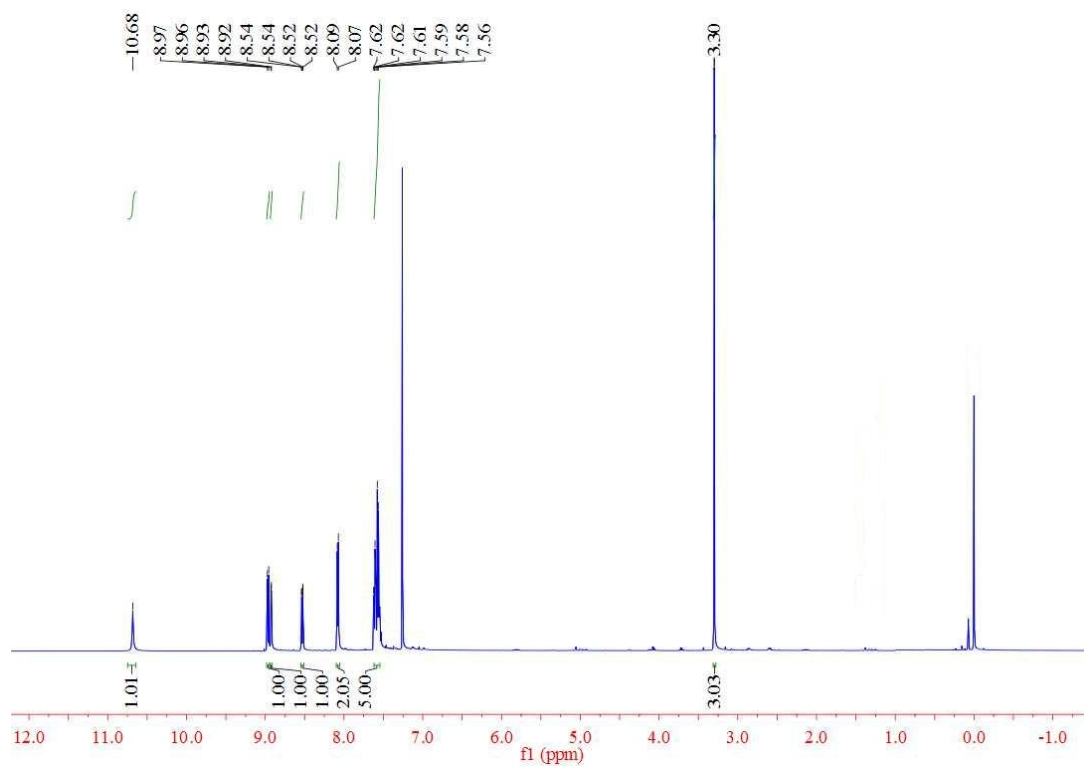

**3f, <sup>13</sup>C NMR**

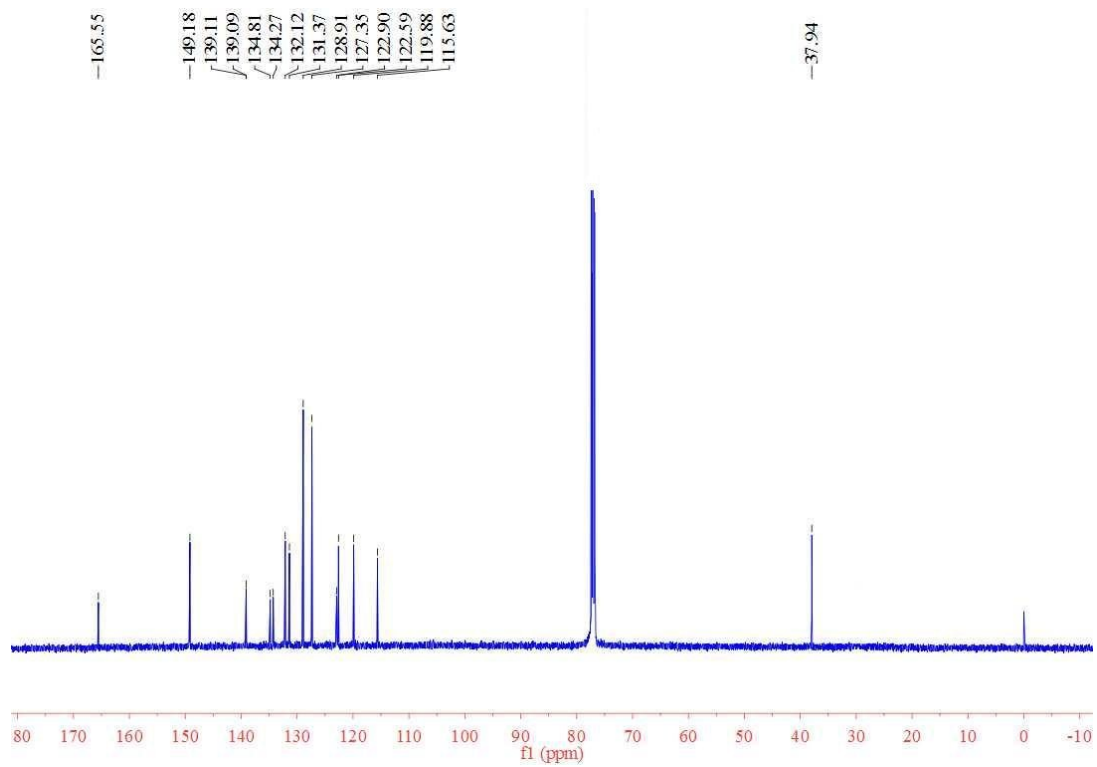

**3g, <sup>1</sup>H NMR**

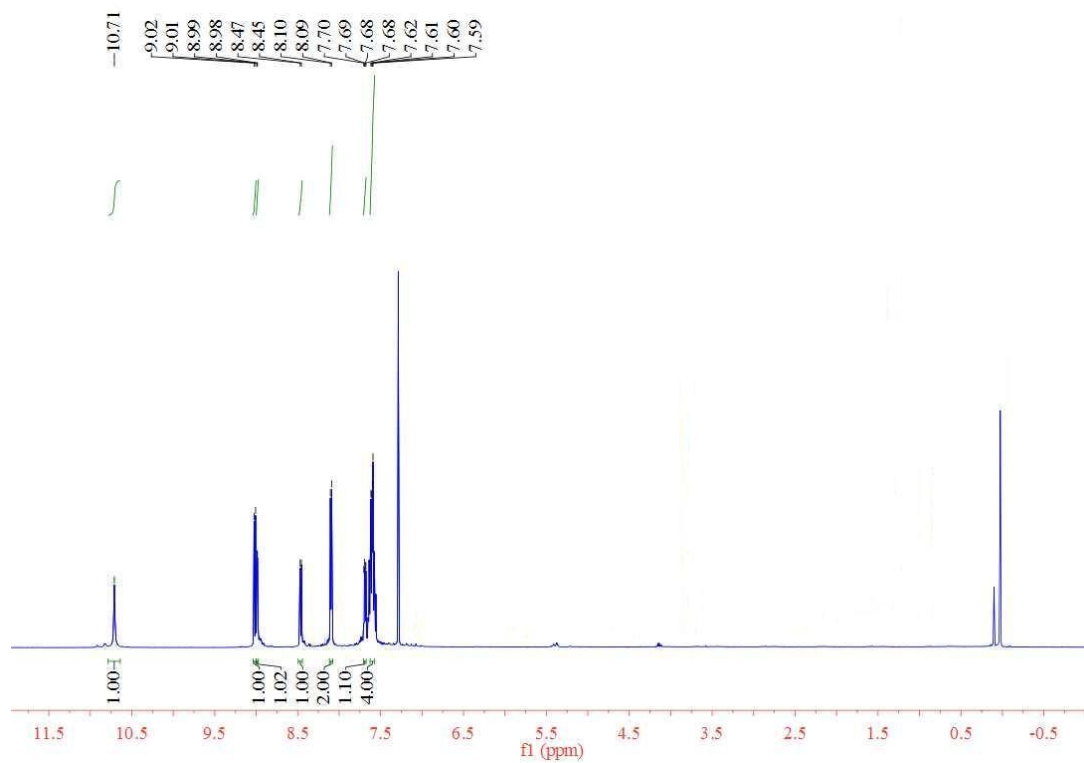

**3g, <sup>13</sup>C NMR**

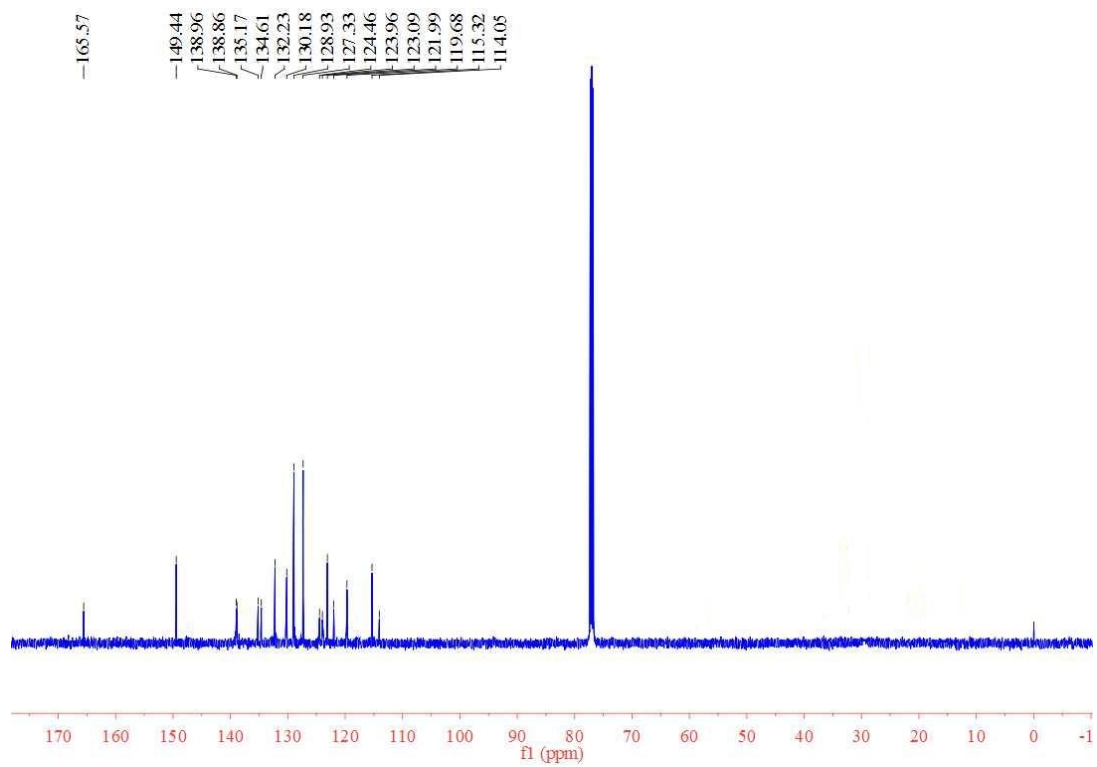

**3h, <sup>1</sup>H NMR**

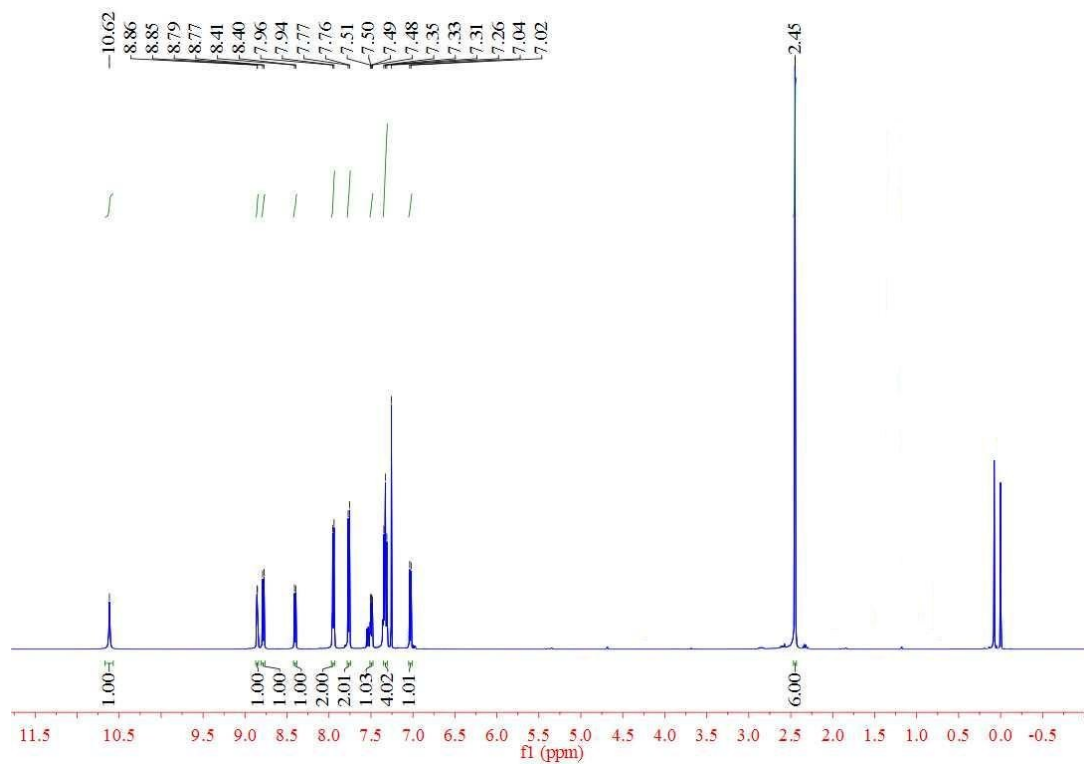

**3h, <sup>13</sup>C NMR**

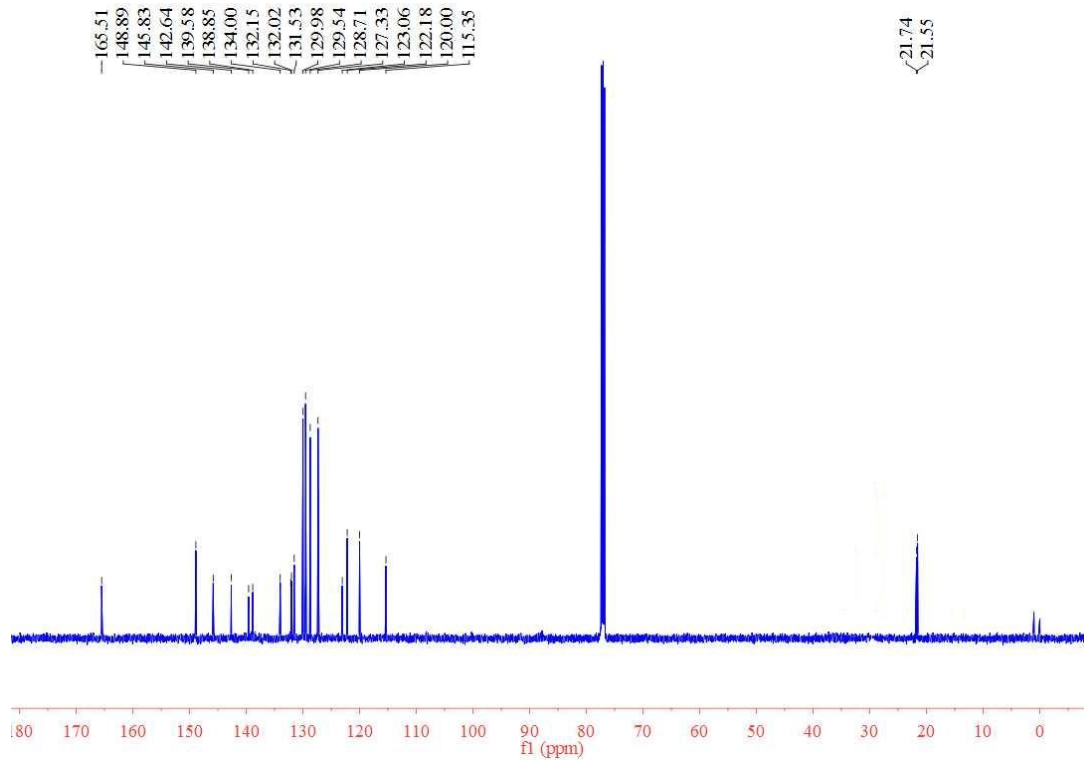

**3i, <sup>1</sup>H NMR**

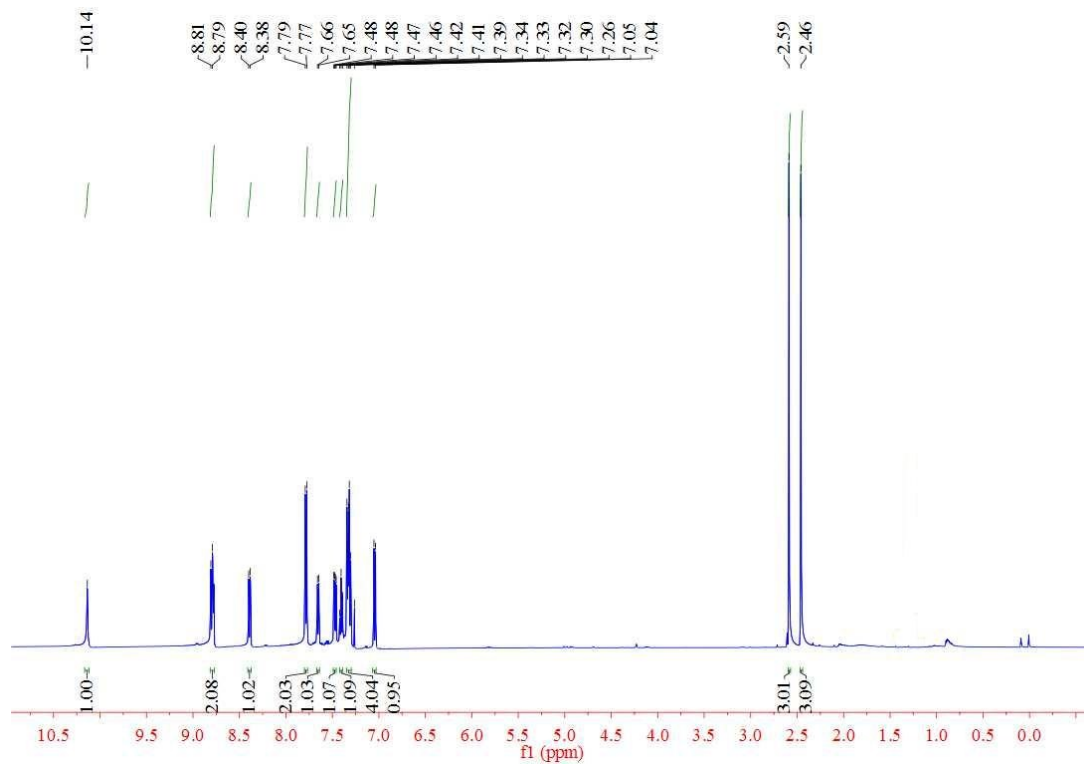

**3i, <sup>13</sup>C NMR**

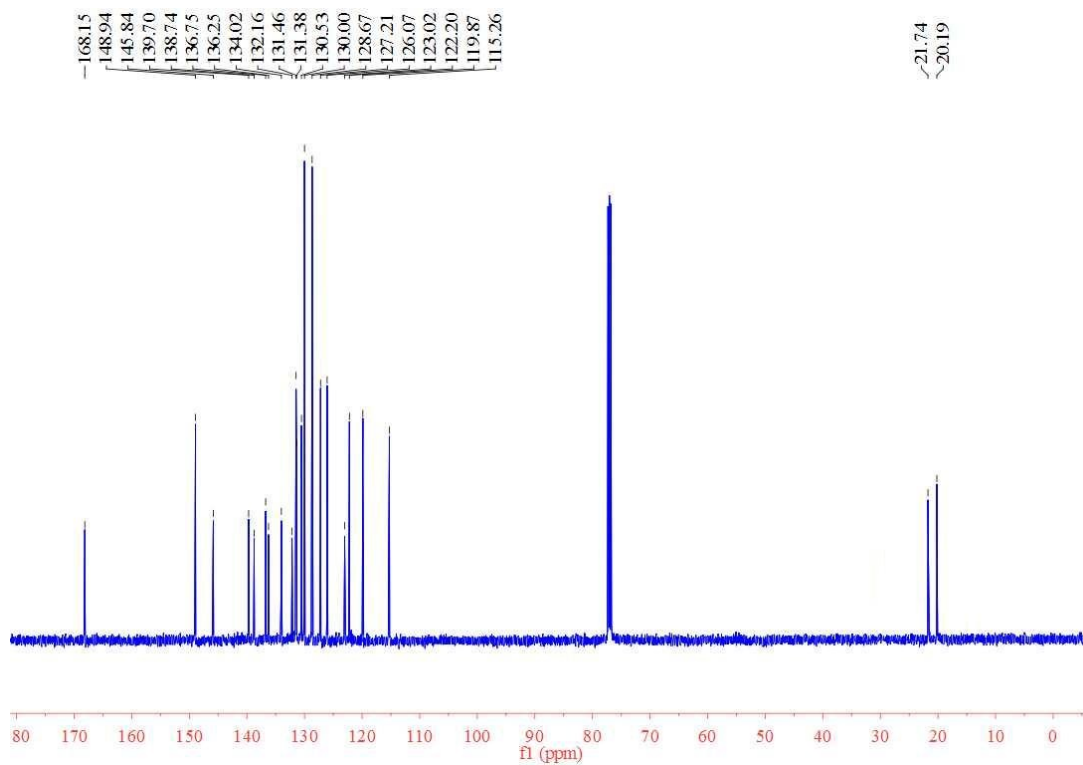

3j, <sup>1</sup>H NMR

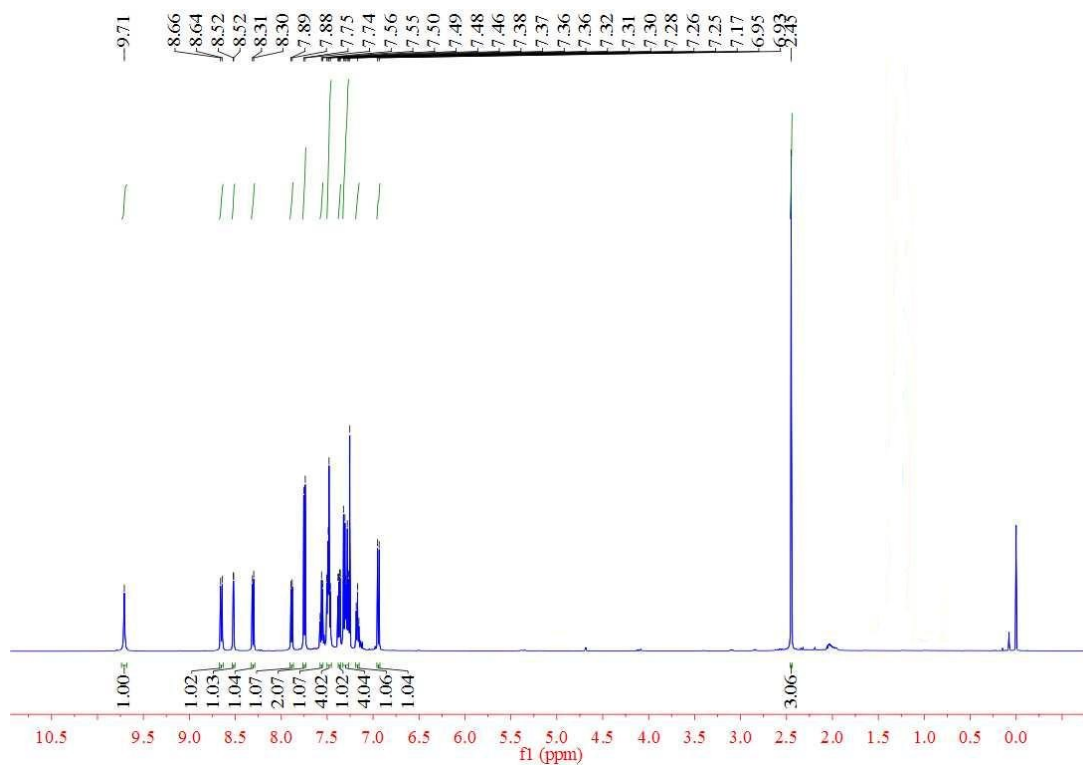

3j, <sup>13</sup>C NMR



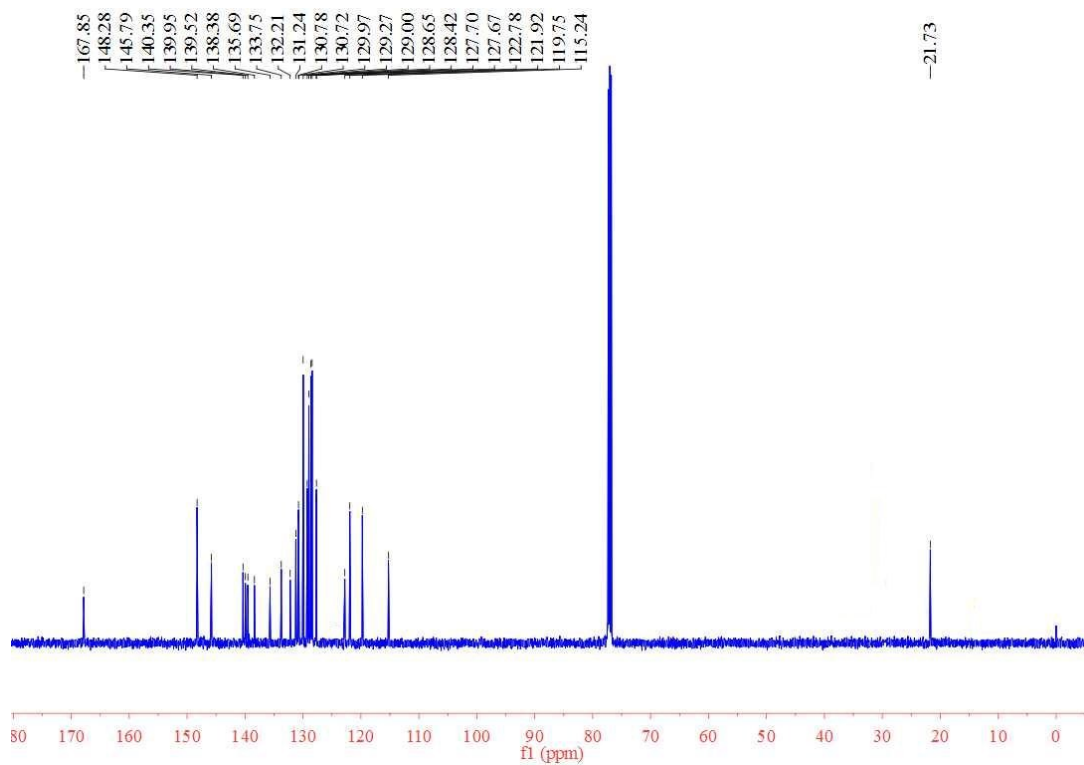

**3k, <sup>1</sup>H NMR**

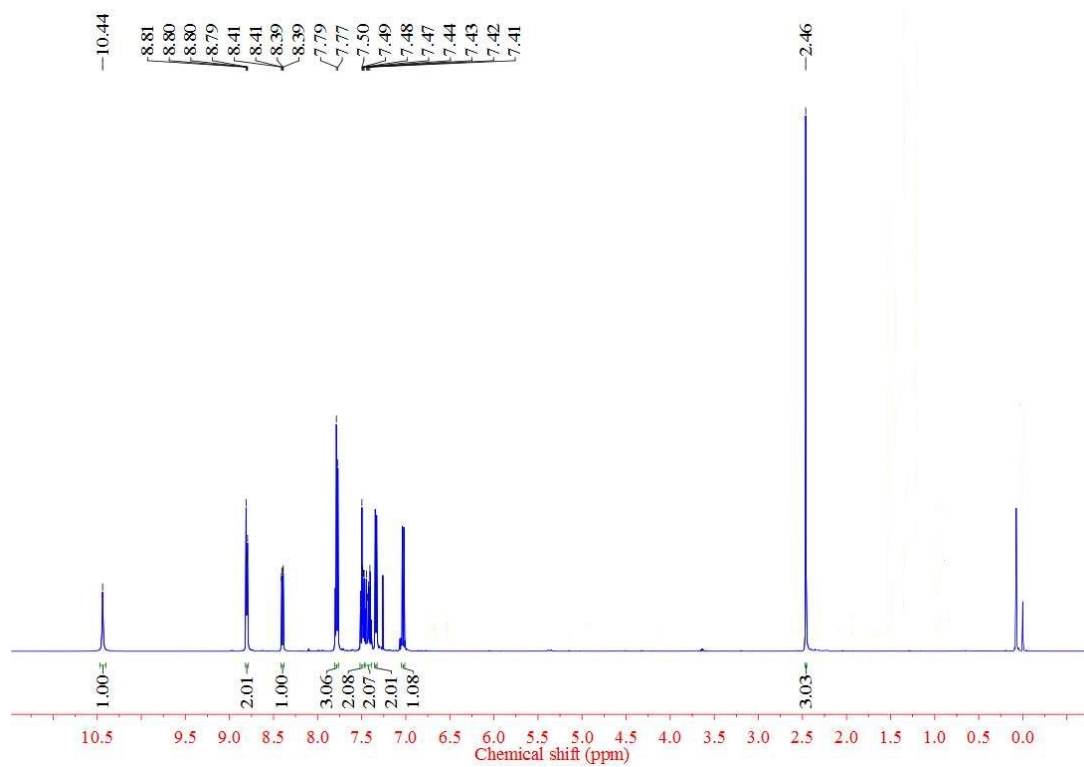

**3k, <sup>13</sup>C NMR**

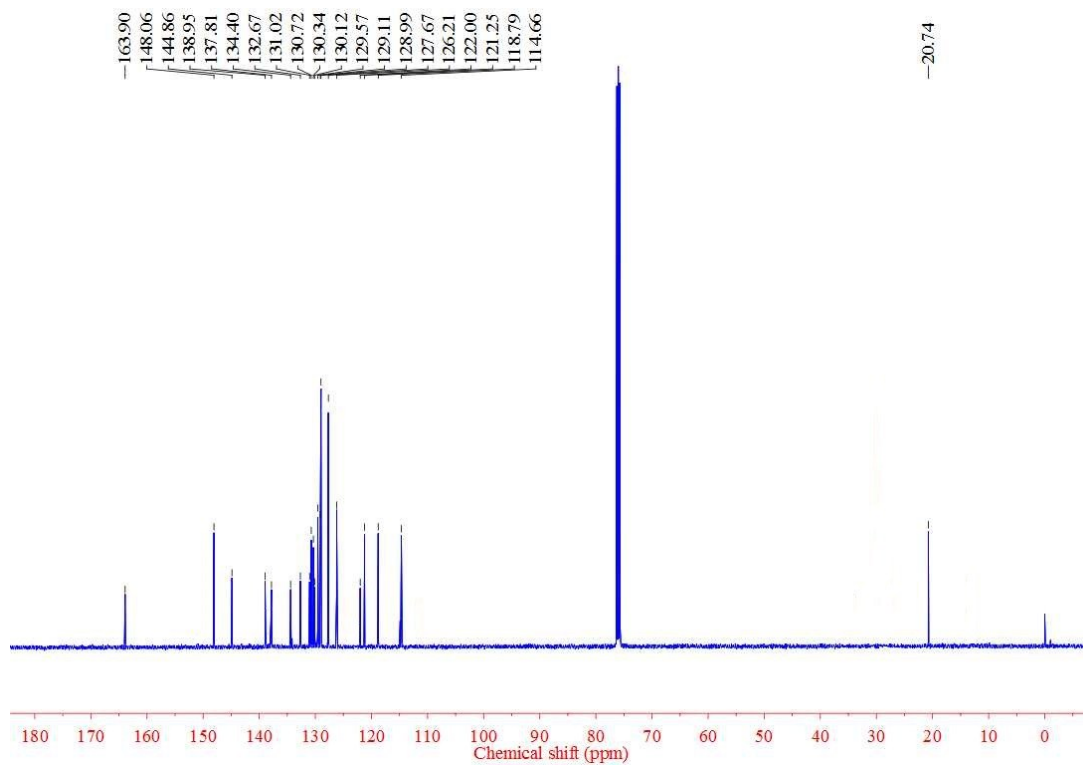

**3l, <sup>1</sup>H NMR**

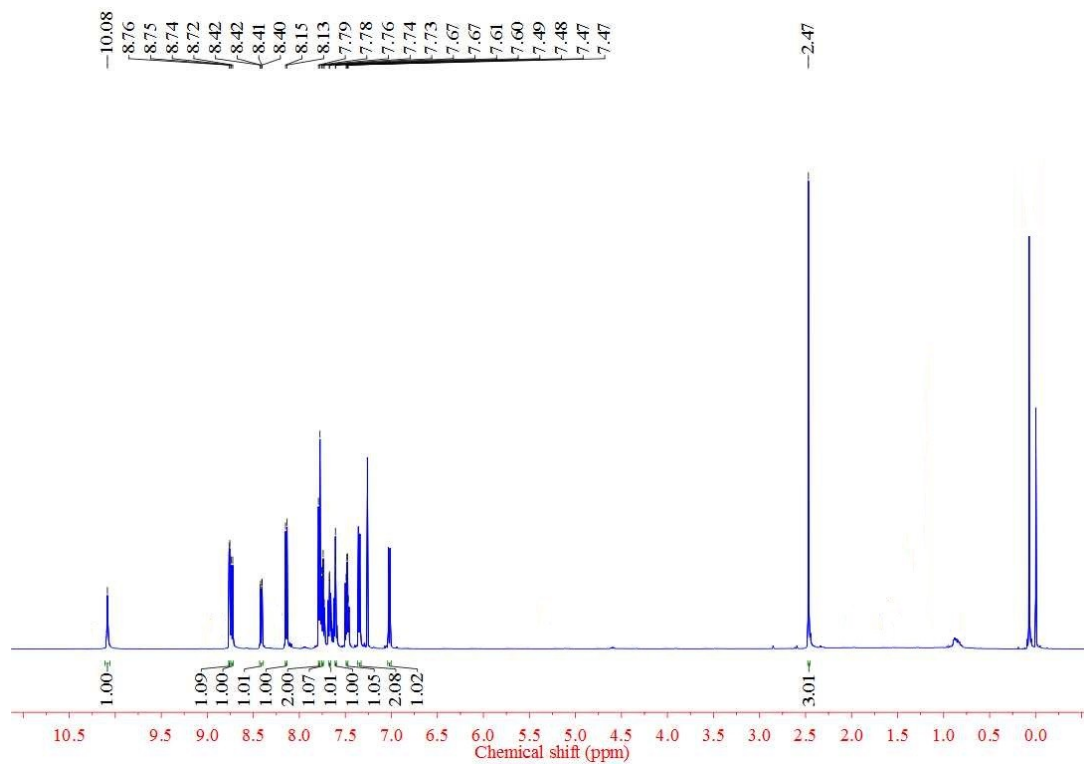

**3l, <sup>13</sup>C NMR**

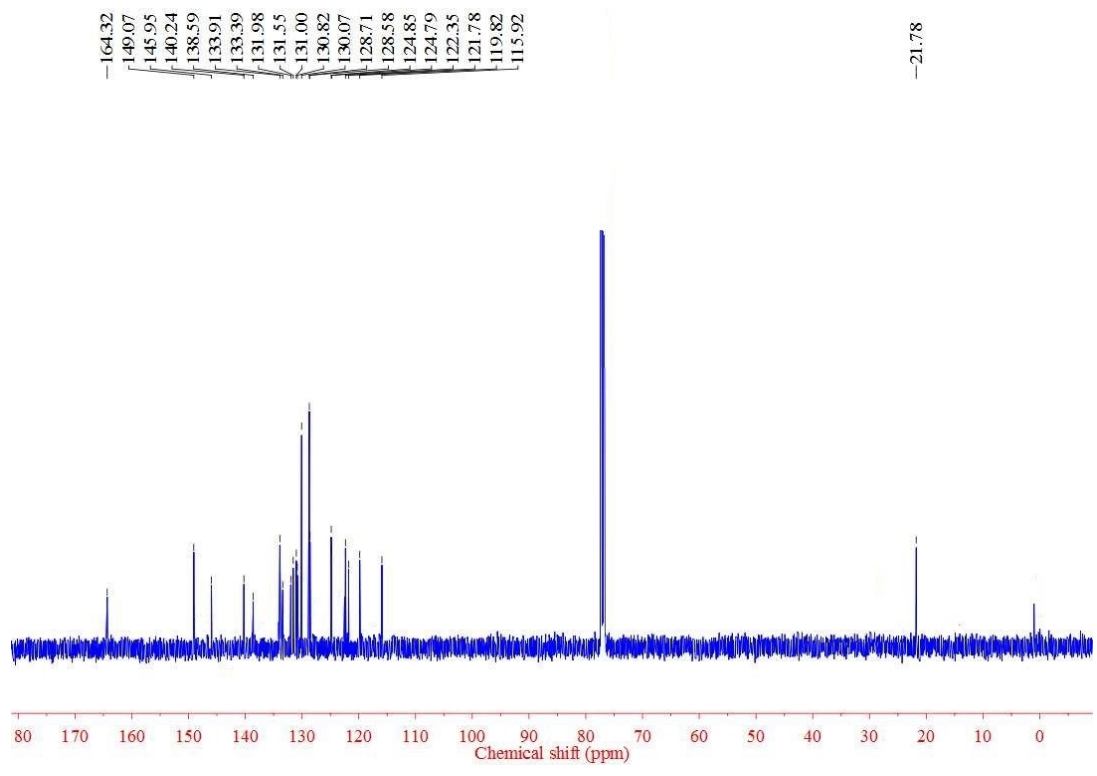

**3m, <sup>1</sup>H NMR**

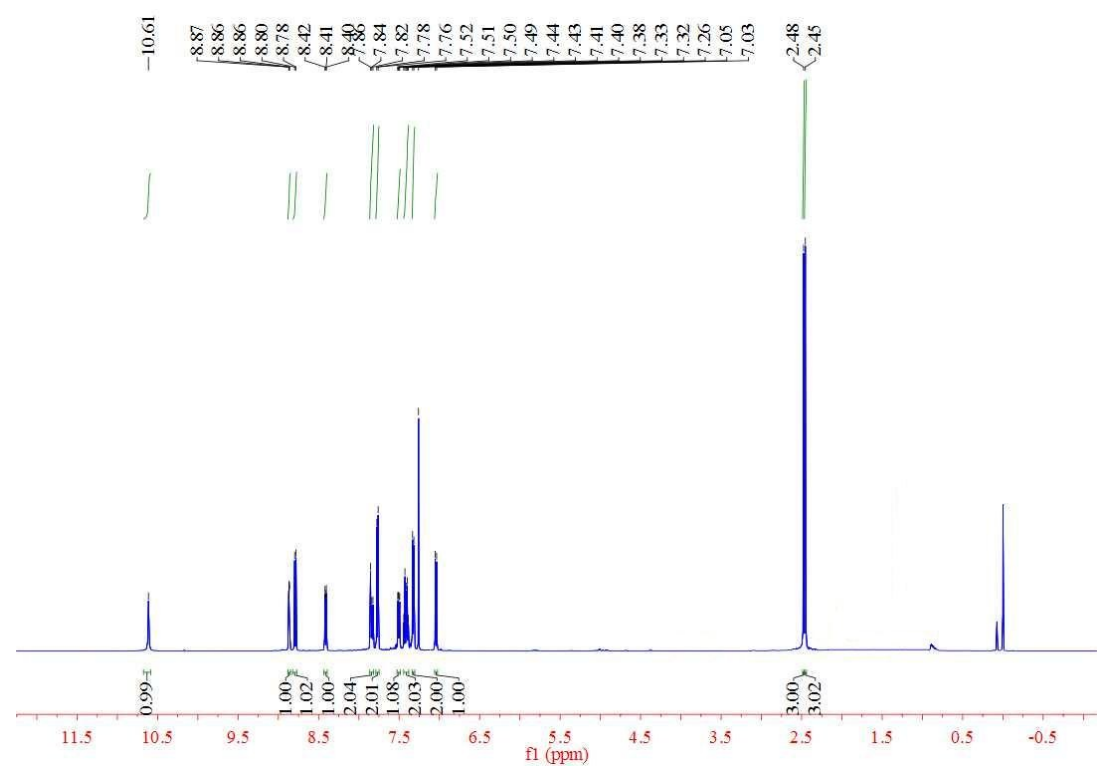

**3m, <sup>13</sup>C NMR**

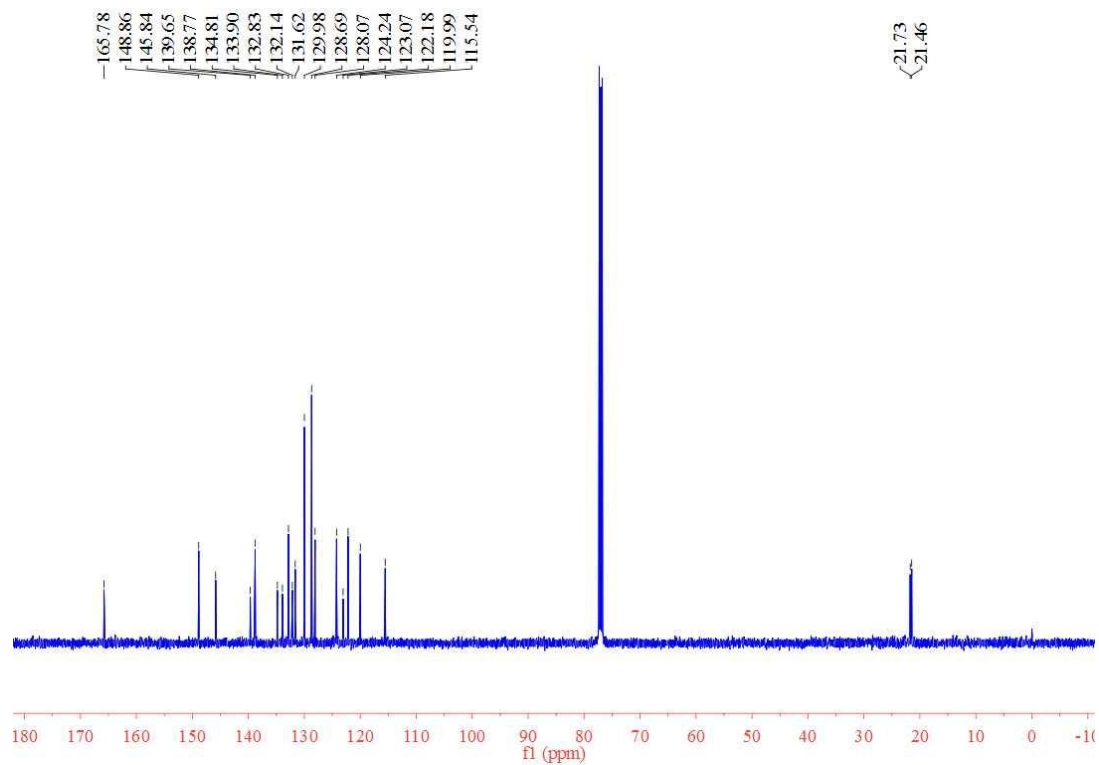

**3n, <sup>1</sup>H NMR**

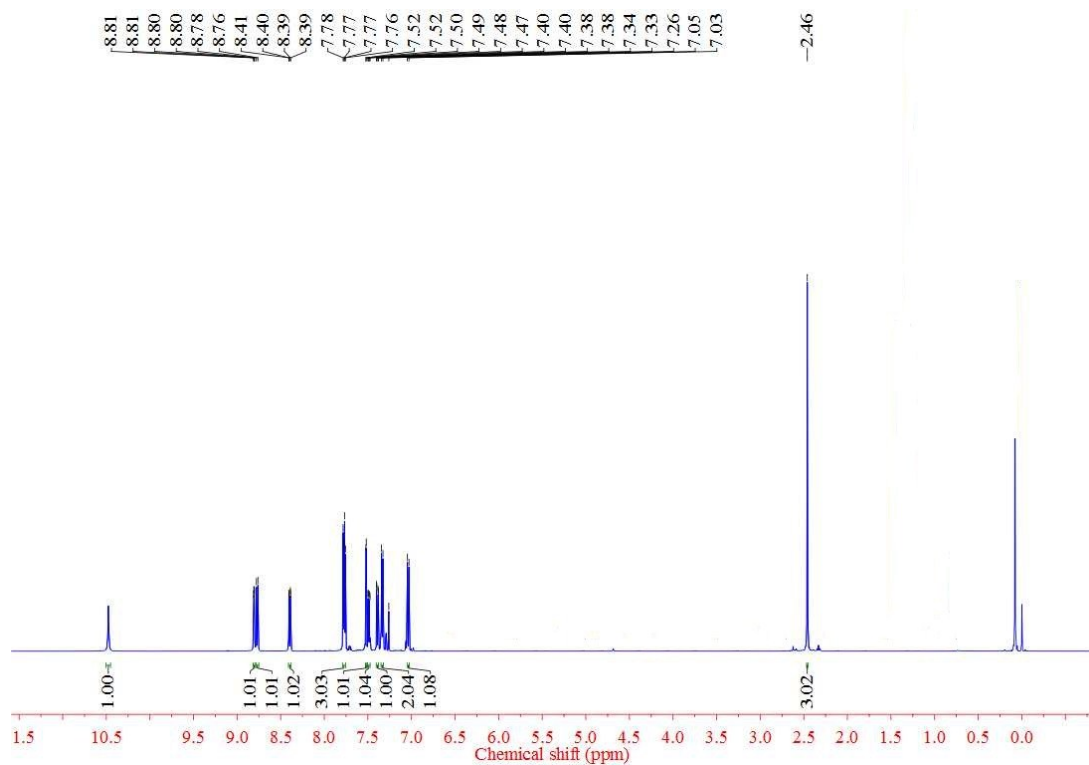

**3n, <sup>13</sup>C NMR**

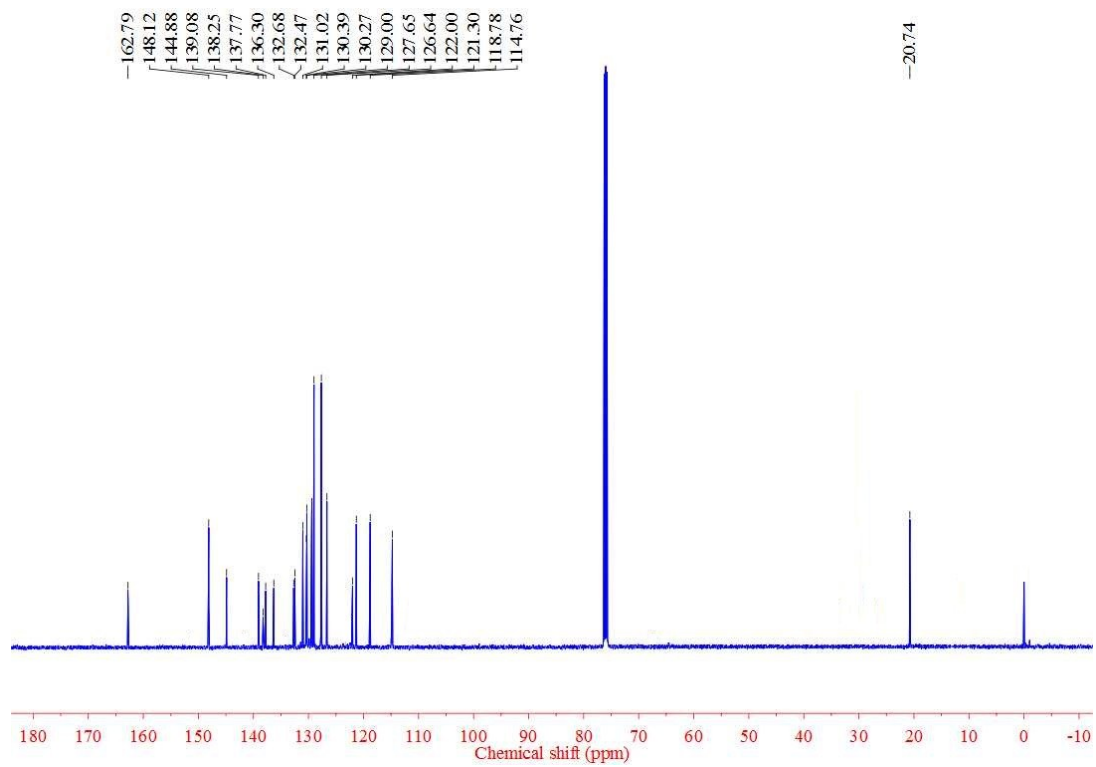

**30, <sup>1</sup>H NMR**

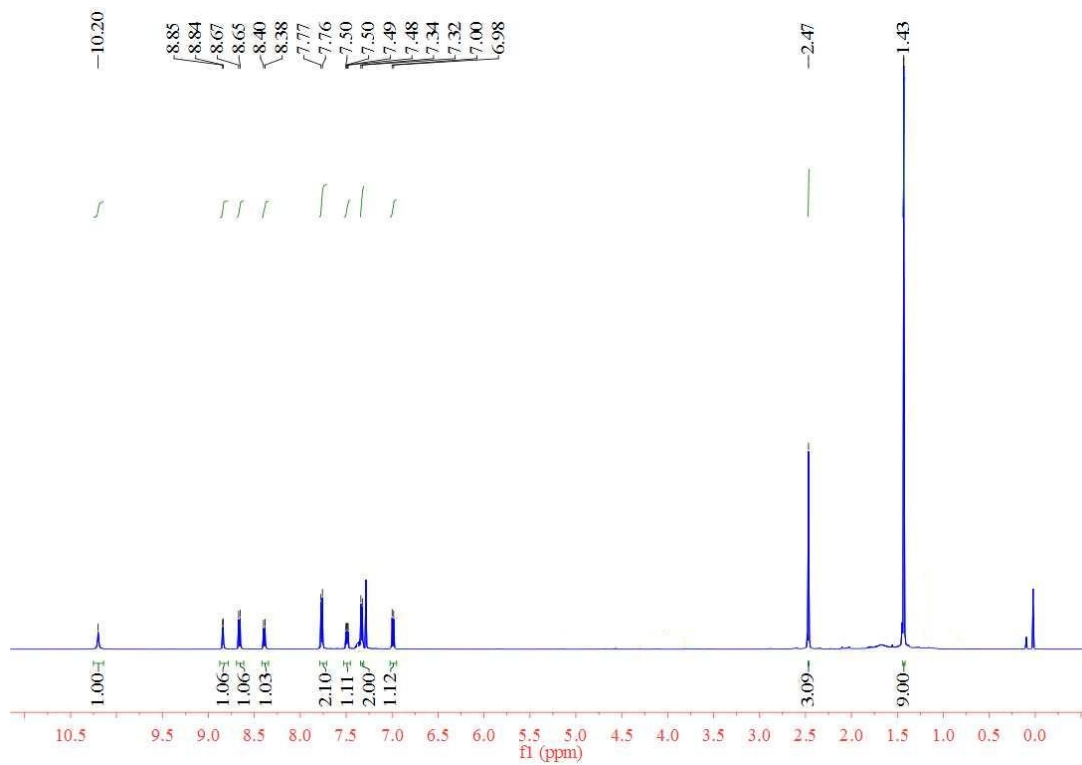

**30, <sup>13</sup>C NMR**

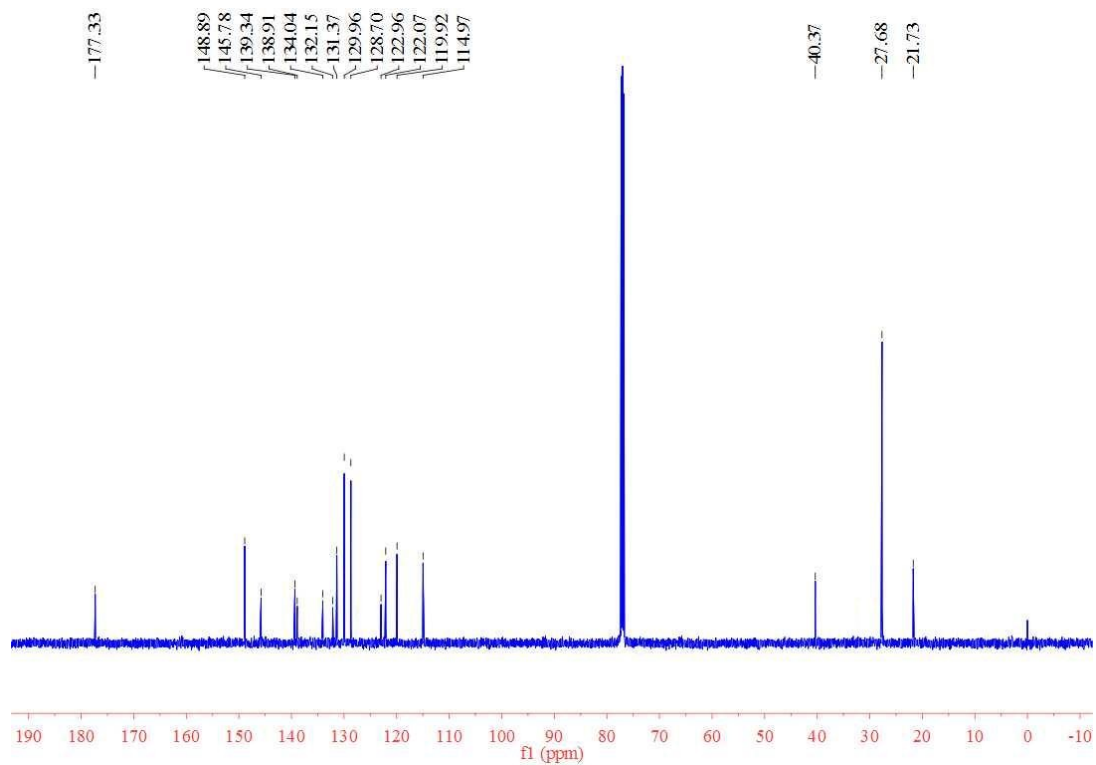

**3p, <sup>1</sup>H NMR**

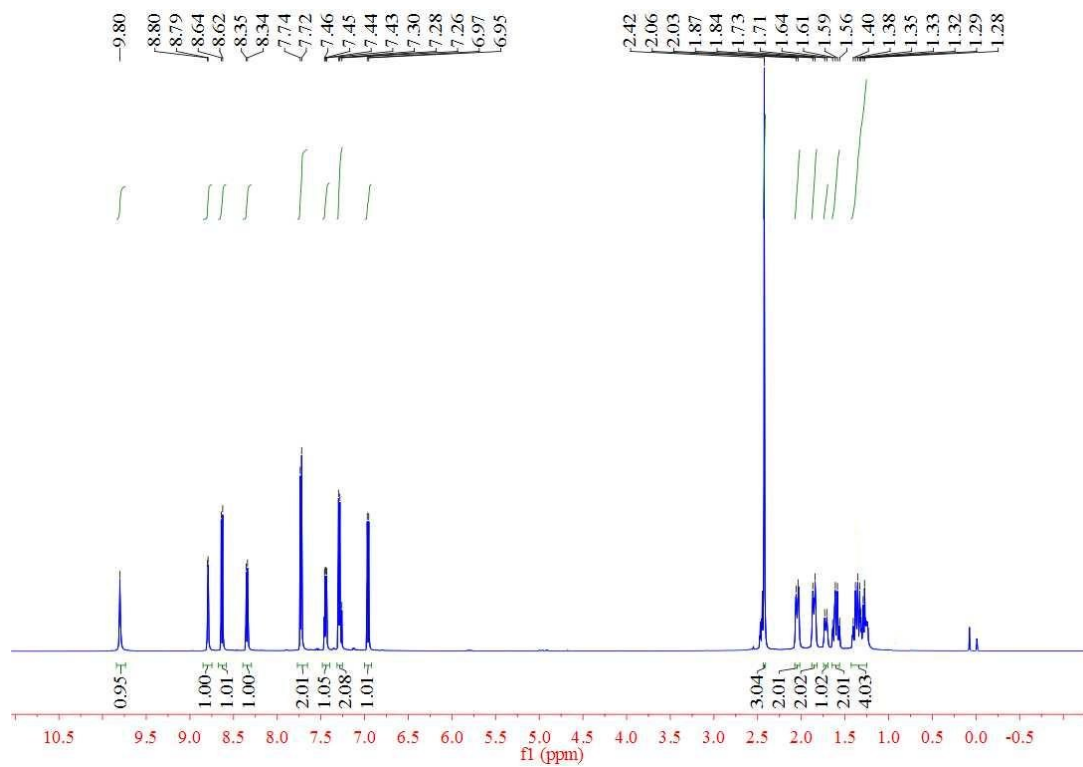

**3p, <sup>13</sup>C NMR**

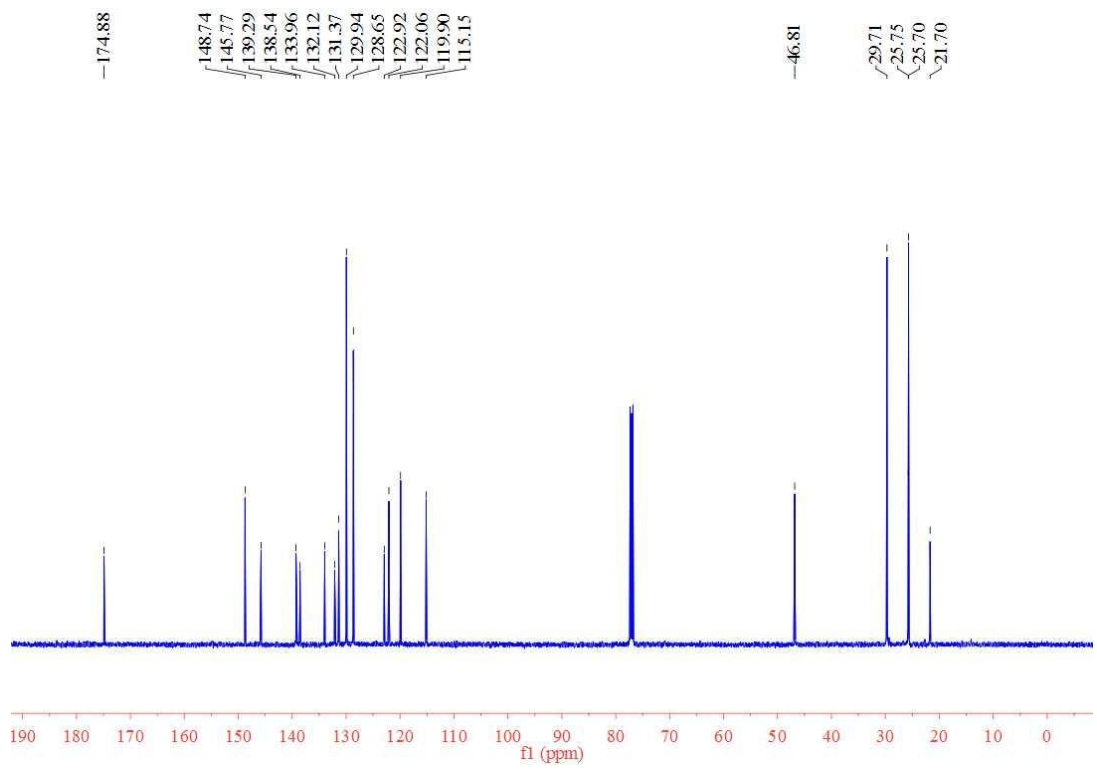

**3q, <sup>1</sup>H NMR**

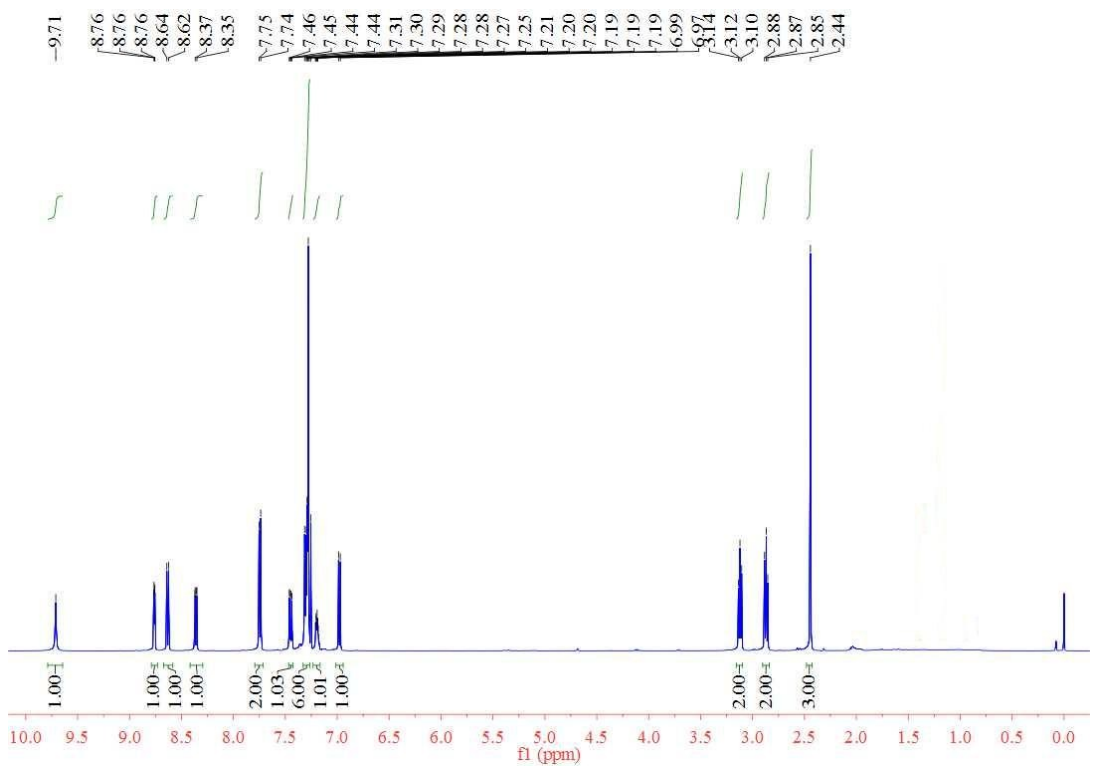

**3q, <sup>13</sup>C NMR**

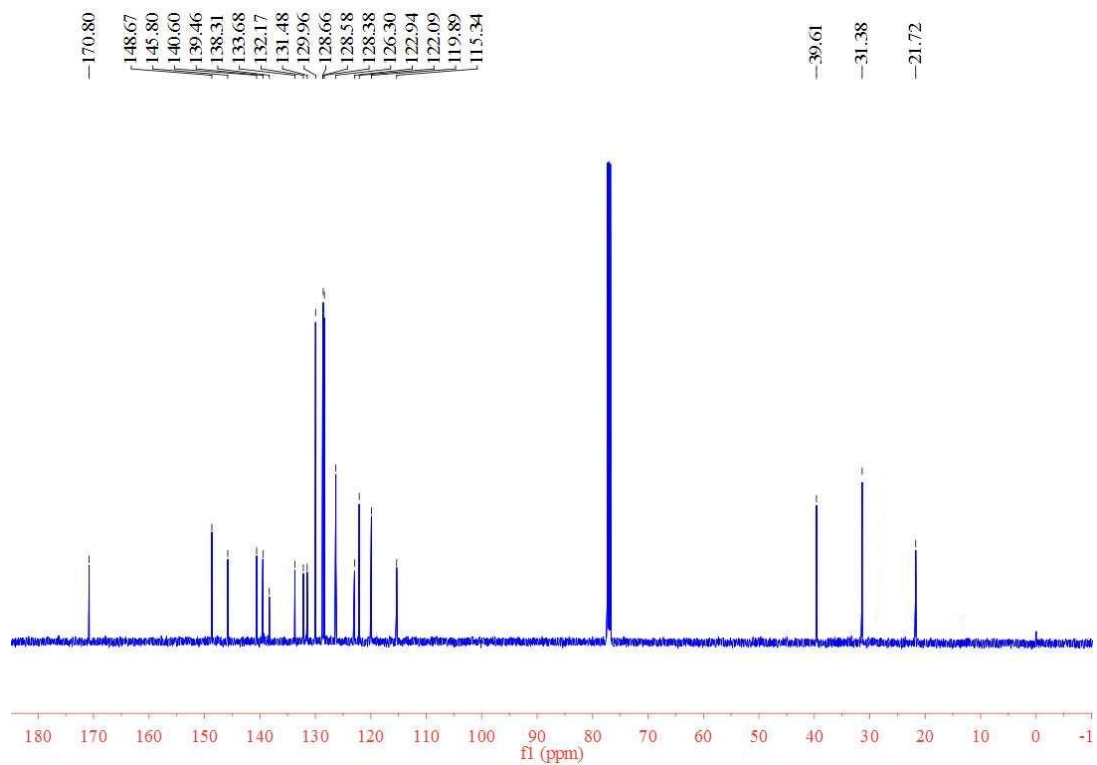

3r, <sup>1</sup>H NMR

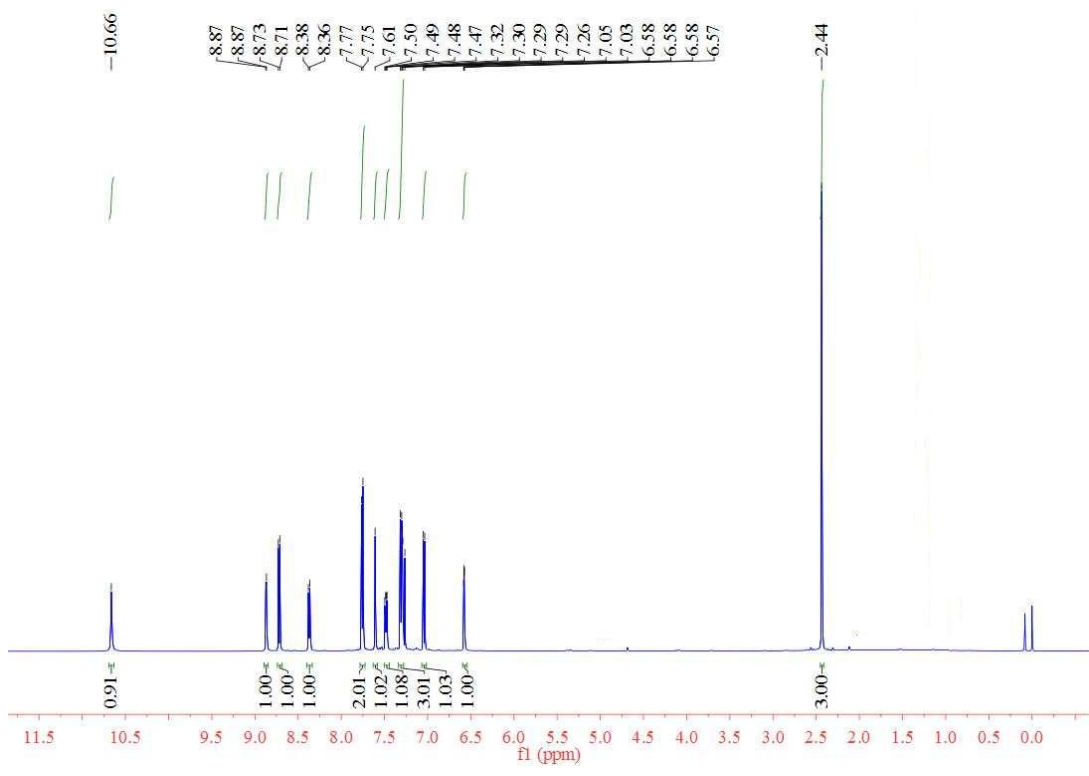

3r, <sup>13</sup>C NMR



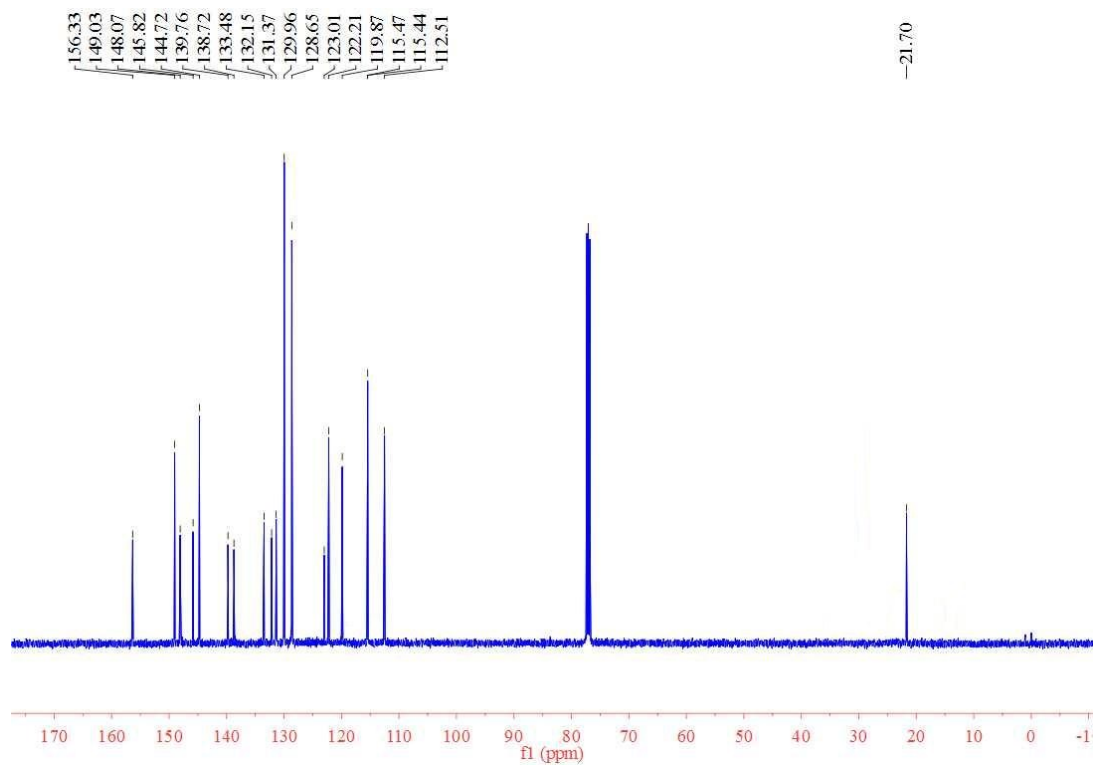

3s, <sup>1</sup>H NMR

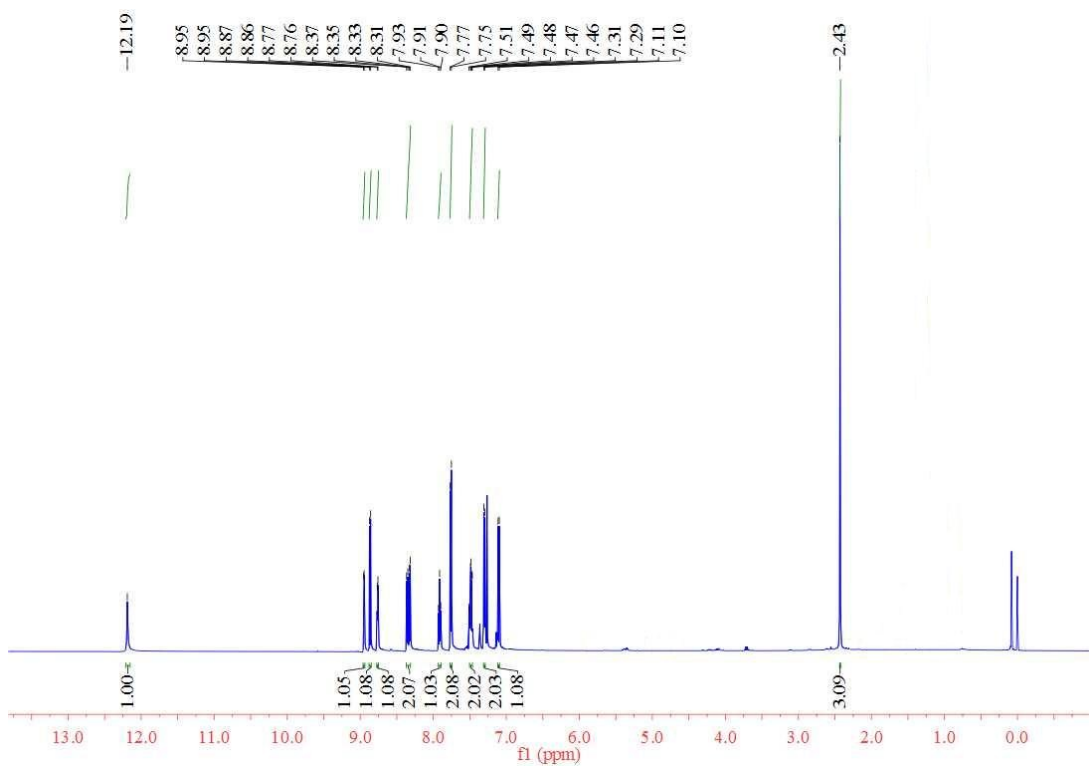

3s, <sup>13</sup>C NMR

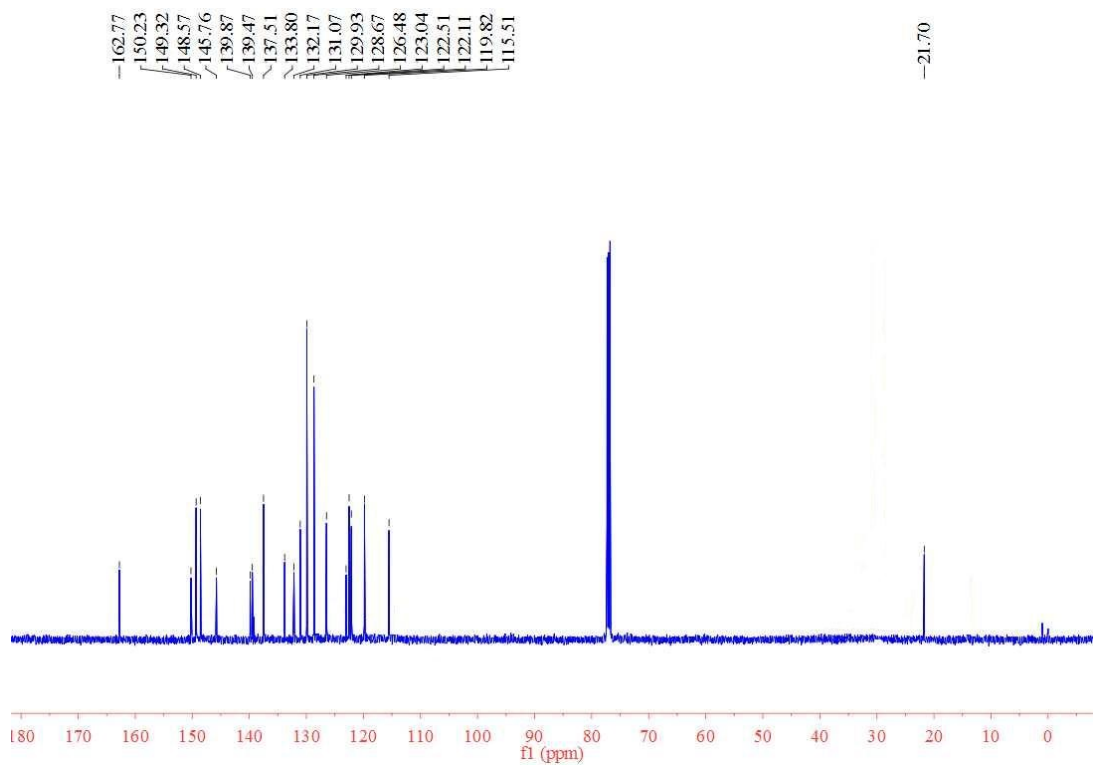

**3t, <sup>1</sup>H NMR**

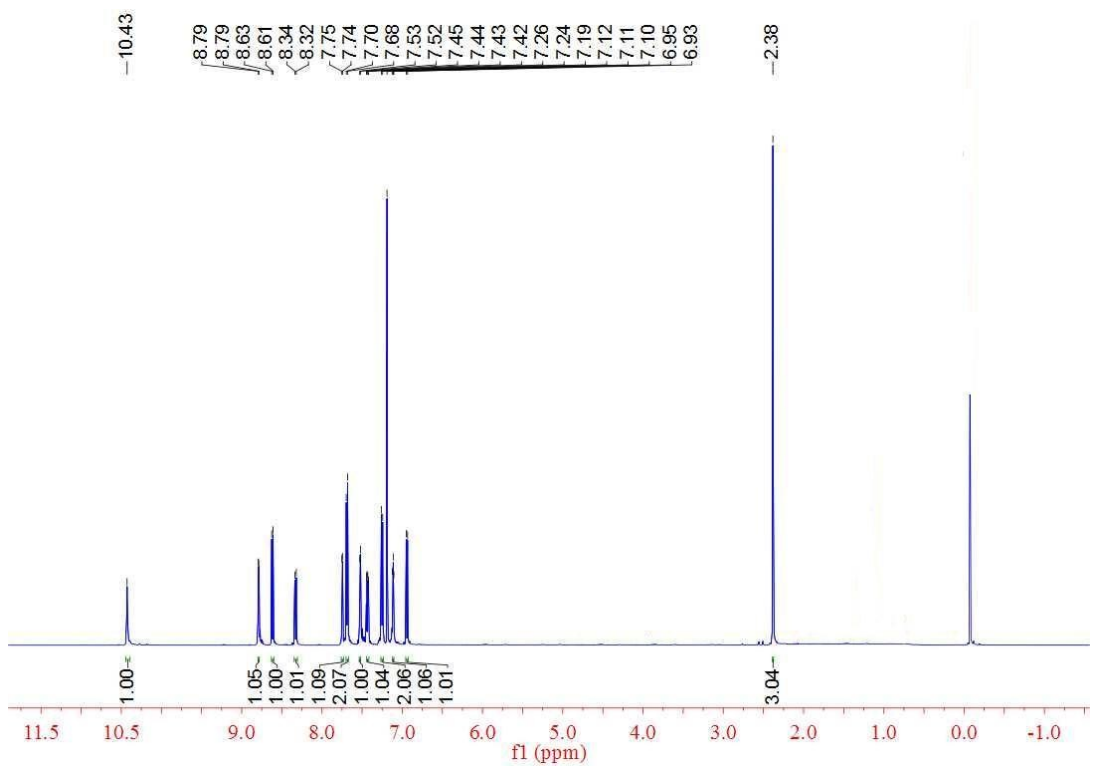

**3t, <sup>13</sup>C NMR**

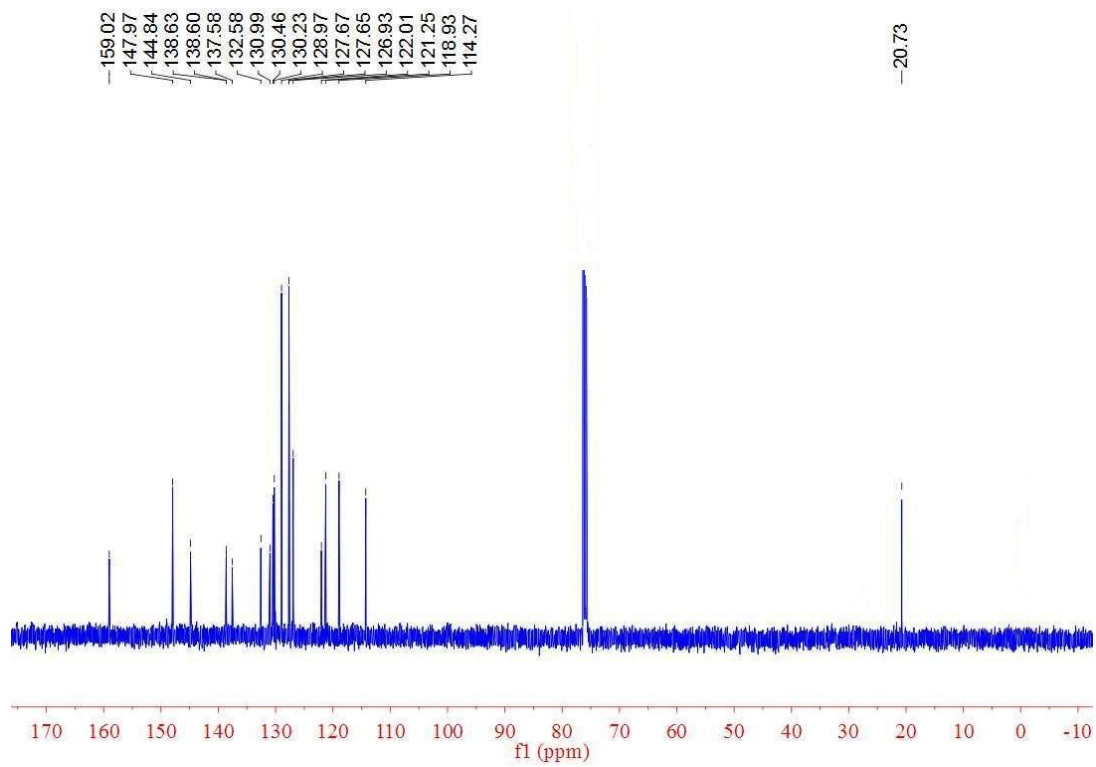

**3u, <sup>1</sup>H NMR**

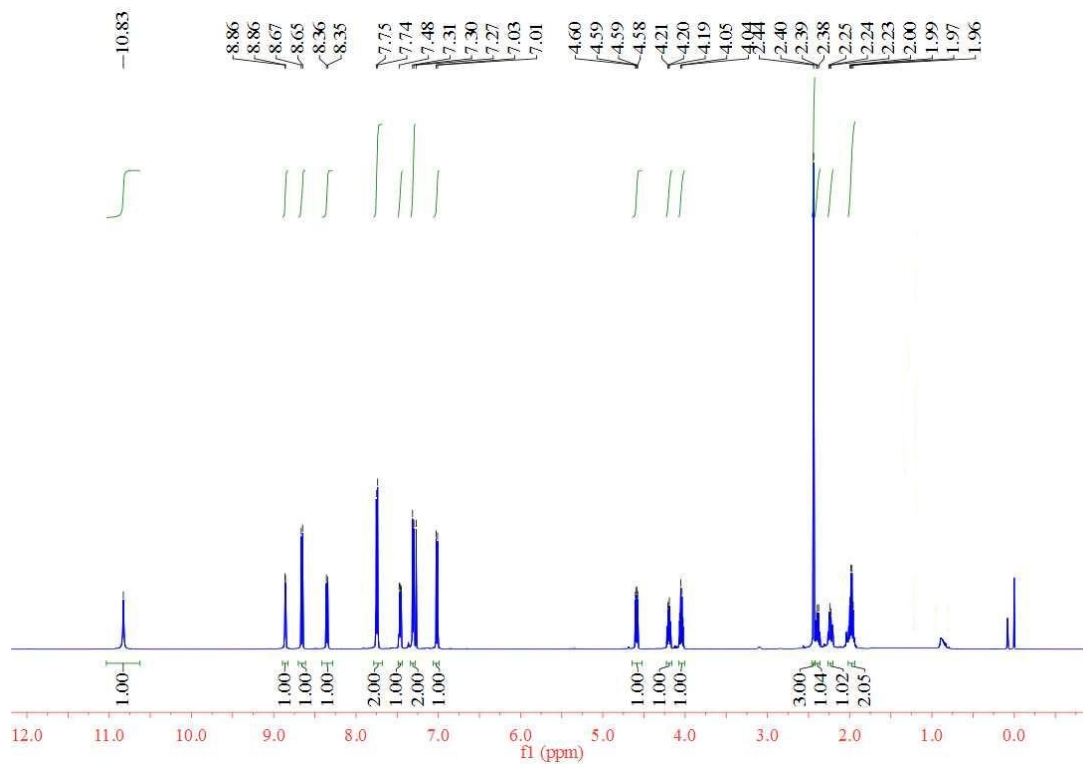

**3u, <sup>13</sup>C NMR**

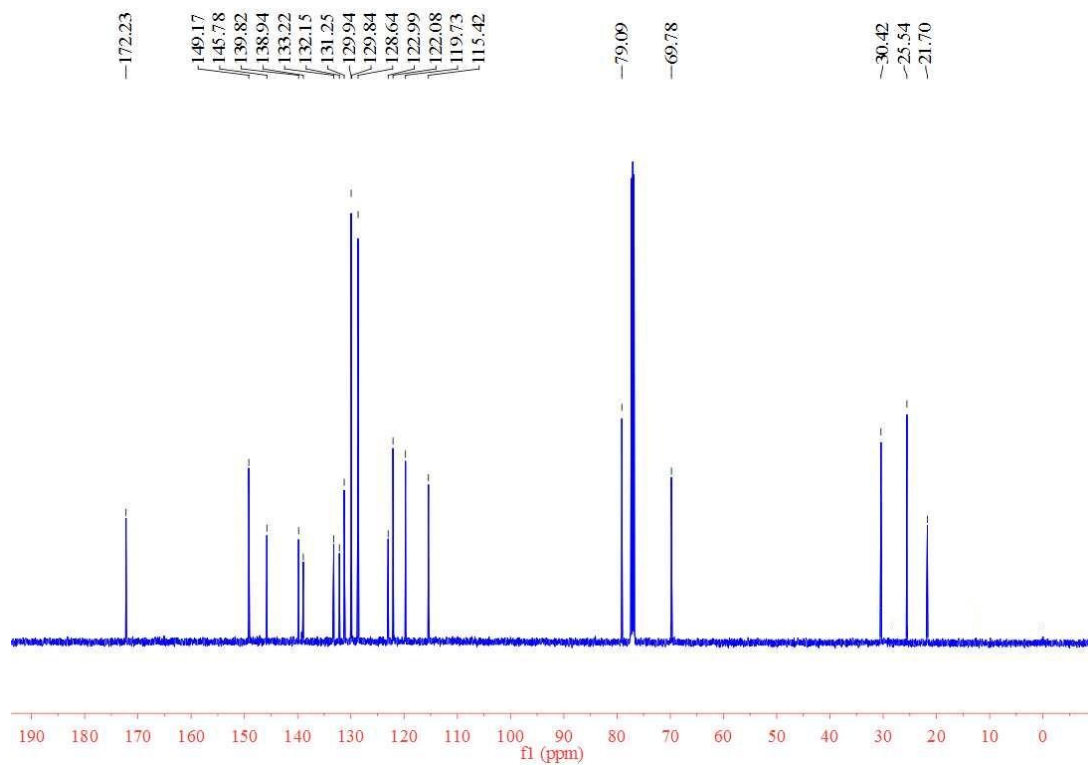

3v, <sup>1</sup>H NMR

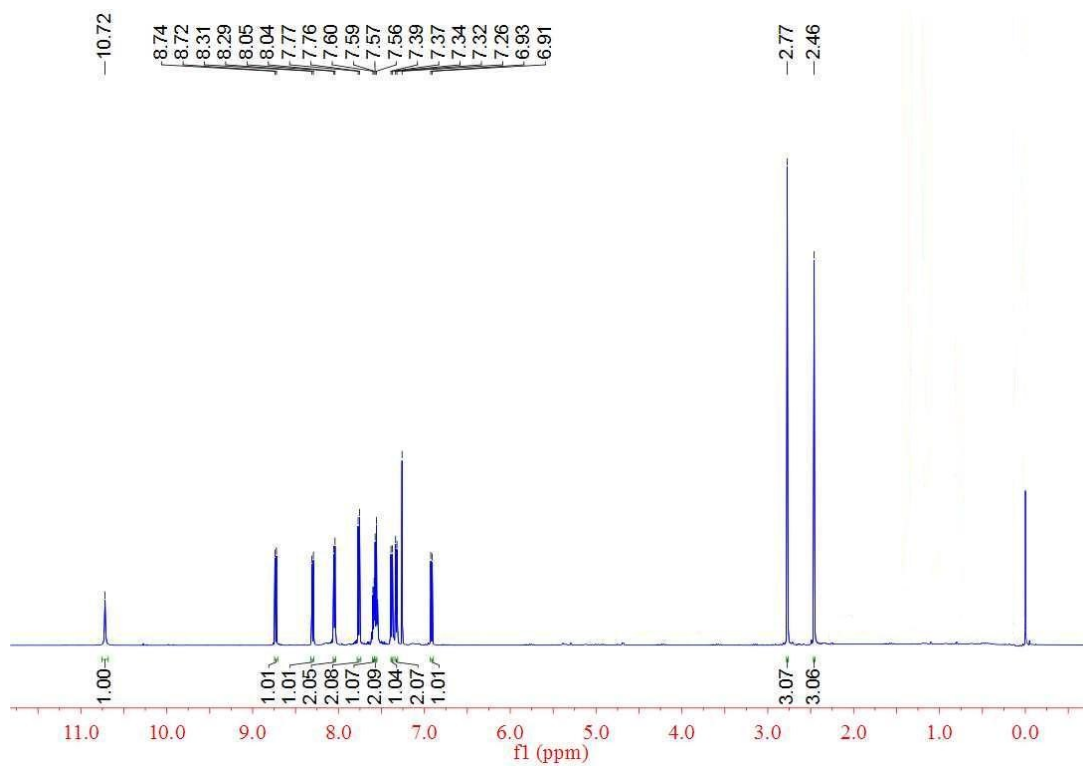

3v, <sup>13</sup>C NMR

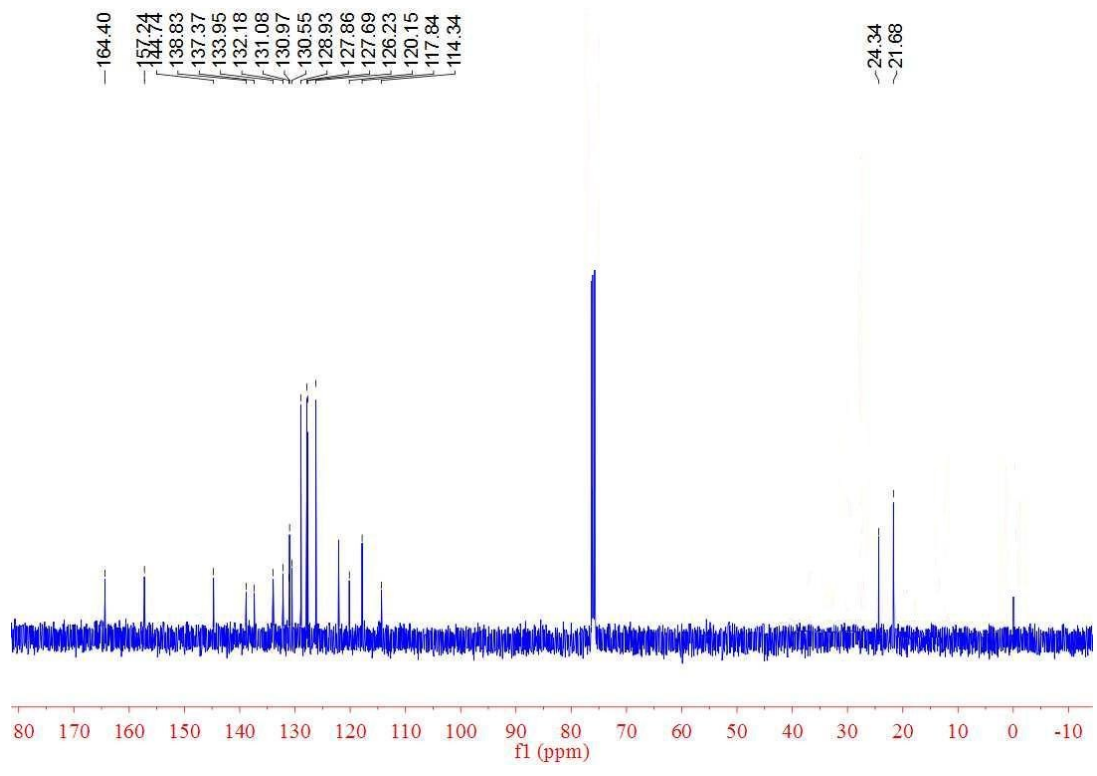

3w, <sup>1</sup>H NMR

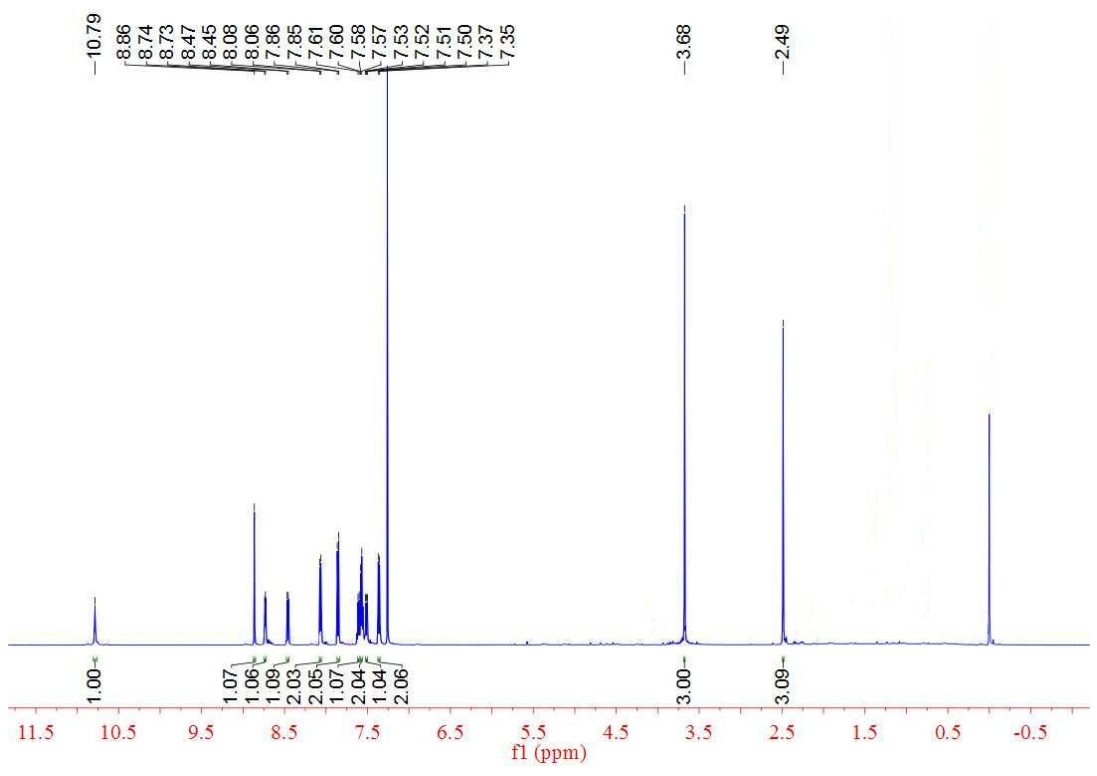

3w, <sup>13</sup>C NMR

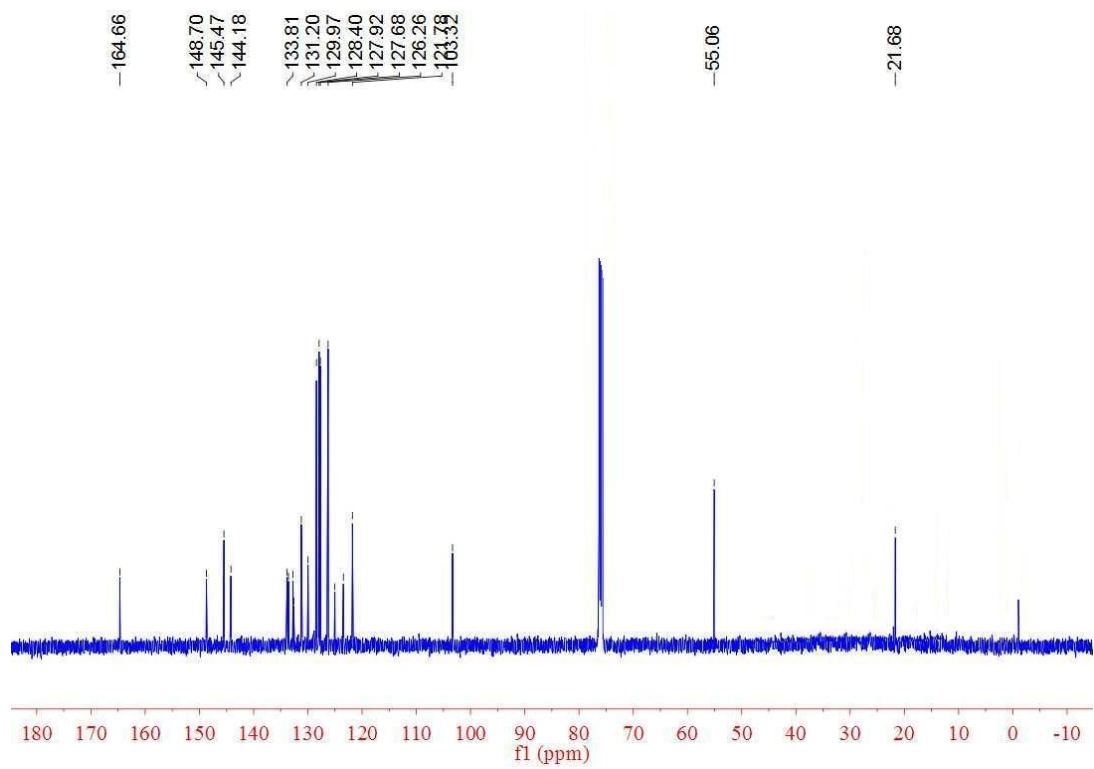

3y, <sup>1</sup>H NMR

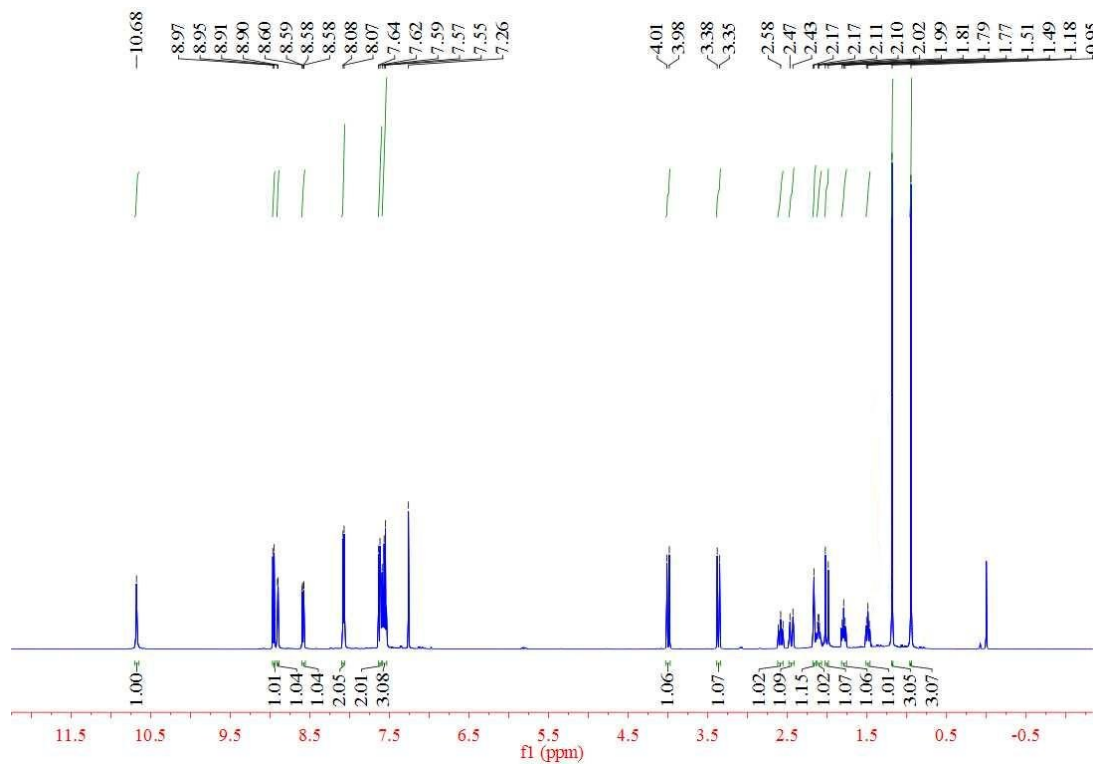

3y, <sup>13</sup>C NMR

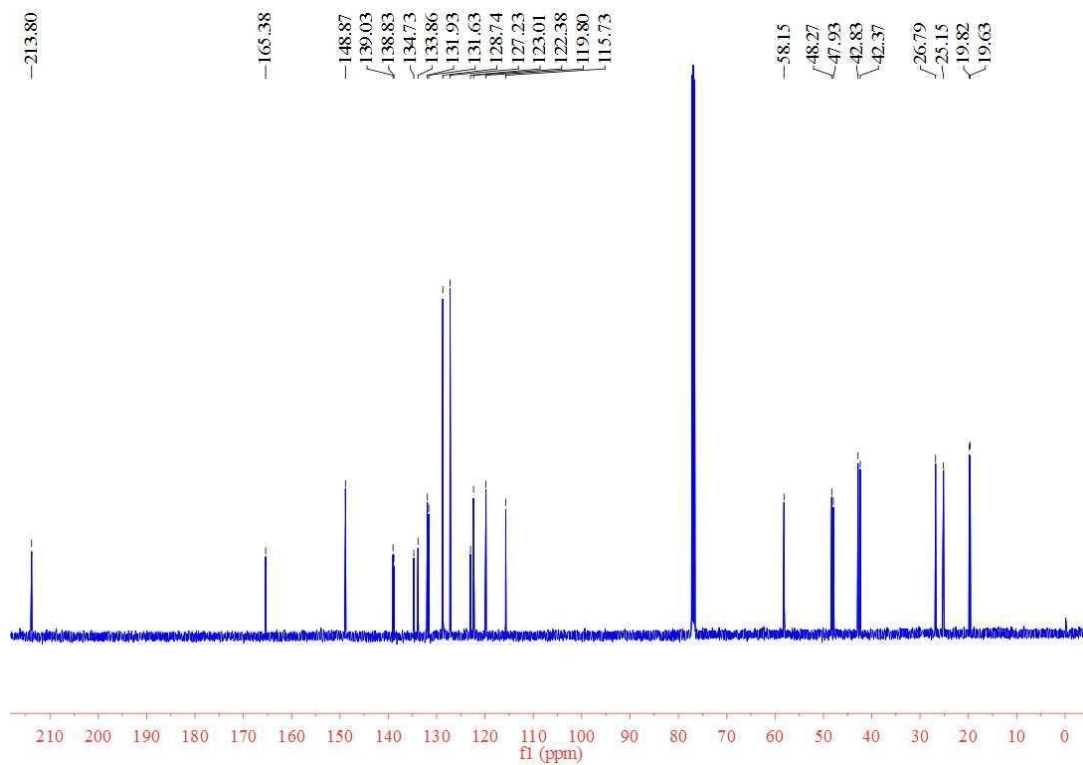

**3z**,  $^1\text{H}$  NMR

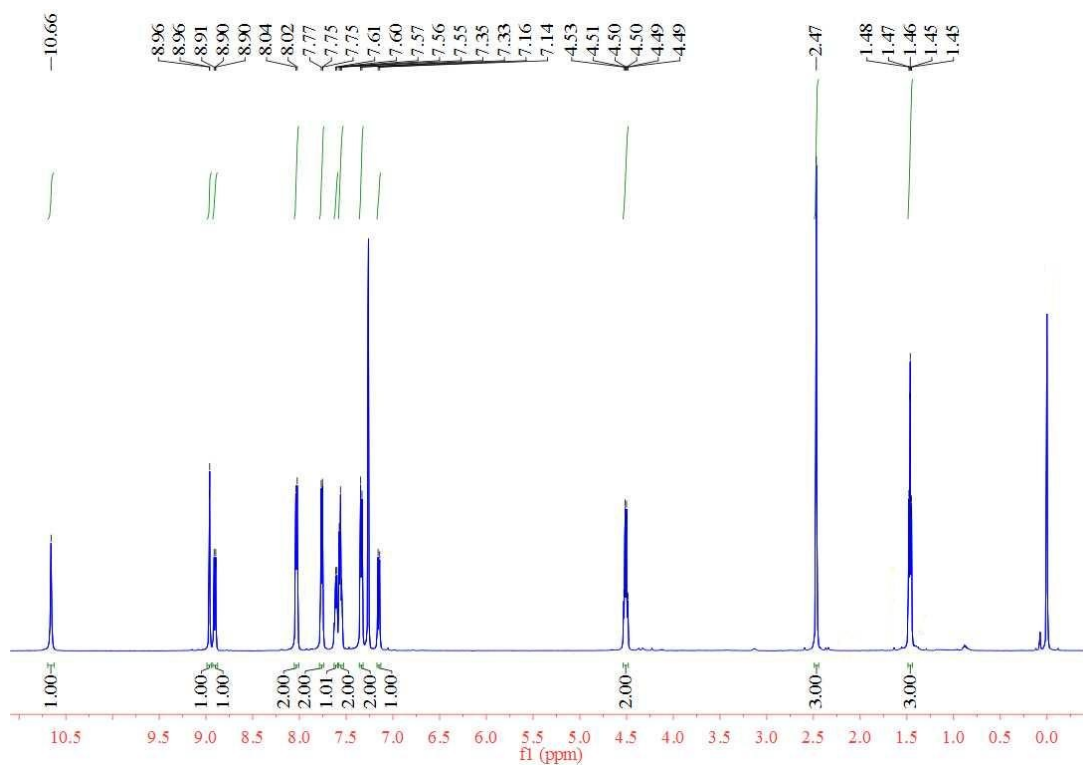

**3z**,  $^{13}\text{C}$  NMR

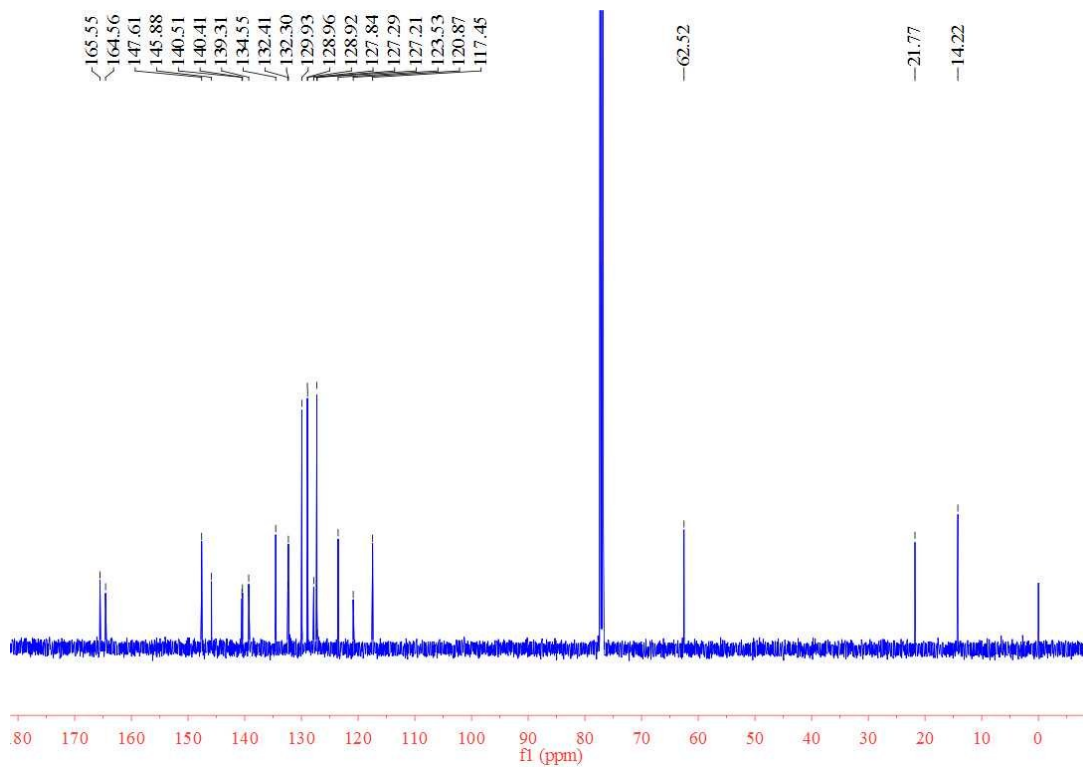

Supplement: c7ra09053f1.pdf [file c7ra09053f1.pdf]
